# Supplementary material for: Costs of switching to low global warming potential inhalers. An economic and carbon footprint analysis of NHS prescription data in England
Source: PubMed Central journal article supplement — BMJ Open. 2019 Oct 29;9(10):e028763. doi: 10.1136/bmjopen-2018-028763 (PMC6830591; doi:10.1136/bmjopen-2018-028763), 2019-10-29
Supplement: bmjopen-2018-028763.draft_revisions.pdf [file bmjopen-2018-028763.draft_revisions.pdf]

# BMJ Open

BMJ Open is committed to open peer review. As part of this commitment we make the peer review history of every article we publish publicly available.

When an article is published we post the peer reviewers' comments and the authors' responses online. We also post the versions of the paper that were used during peer review. These are the versions that the peer review comments apply to.

The versions of the paper that follow are the versions that were submitted during the peer review process. They are not the versions of record or the final published versions. They should not be cited or distributed as the published version of this manuscript.

BMJ Open is an open access journal and the full, final, typeset and author-corrected version of record of the manuscript is available on our site with no access controls, subscription charges or pay-per-view fees (<http://bmjopen.bmj.com>).

If you have any questions on BMJ Open's open peer review process please email [info.bmjopen@bmj.com](mailto:info.bmjopen@bmj.com)

# BMJ Open

**The costs of switching to low global-warming potential inhalers. An economic and carbon footprint analysis of NHS prescription data in England.**

|                               |                                                                                                                                                                                                                                                                                                                                                           |
|-------------------------------|-----------------------------------------------------------------------------------------------------------------------------------------------------------------------------------------------------------------------------------------------------------------------------------------------------------------------------------------------------------|
| Journal:                      | <i>BMJ Open</i>                                                                                                                                                                                                                                                                                                                                           |
| Manuscript ID                 | bmjopen-2018-028763                                                                                                                                                                                                                                                                                                                                       |
| Article Type:                 | Research                                                                                                                                                                                                                                                                                                                                                  |
| Date Submitted by the Author: | 30-Jan-2019                                                                                                                                                                                                                                                                                                                                               |
| Complete List of Authors:     | Wilkinson, Alexander; East and North Hertfordshire NHS Trust, Respiratory Department<br>Braggins, Rory; University of Cambridge Department of Public Health and Primary Care, School of Clinical Medicine<br>Steinbach, Ingeborg; Centre for Sustainable Healthcare<br>Smith, James; University of Cambridge Department of Public Health and Primary Care |
| Keywords:                     | Asthma < THORACIC MEDICINE, HEALTH ECONOMICS, RESPIRATORY MEDICINE (see Thoracic Medicine), Adult thoracic medicine < THORACIC MEDICINE, Chronic airways disease < THORACIC MEDICINE                                                                                                                                                                      |
|                               |                                                                                                                                                                                                                                                                                                                                                           |

SCHOLARONE™  
Manuscripts

1  
2  
3 **The costs of switching to low global-warming potential inhalers. An economic and**  
4 **carbon footprint analysis of NHS prescription data in England.**  
5  
6  
7

8 **Corresponding Author**  
9

10 Alexander JK Wilkinson, Respiratory Department, East and North Hertfordshire NHS  
11 Trust, Lister Hospital, Corey's Mill Lane, Stevenage, SG1 4AB, UK  
12  
13

14  
15  
16 Email: [Alex.wilkinson2@nhs.net](mailto:Alex.wilkinson2@nhs.net)  
17

18  
19 Tel: 07843209392 01480 234936  
20

21 **Co-Authors:**  
22

23  
24 Rory Braggins University of Cambridge Department of Public Health and Primary Care,  
25 School of Clinical Medicine, Cambridge, Cambridgeshire, UK  
26  
27

28  
29 Ingeborg Steinbach, Centre for Sustainable Healthcare, Oxford, Oxfordshire, UK  
30

31  
32 James Smith, University of Cambridge Department of Public Health and Primary Care  
33 Cambridge, Cambridgeshire, UK  
34  
35

36  
37 **Keywords:** Asthma, Chronic Airways Disease, Respiratory Medicine, Health Economics  
38

39  
40 **Word count** (excluding title page, abstract, references, figures and tables): 3491  
41  
42  
43  
44  
45  
46  
47  
48  
49  
50  
51  
52  
53  
54  
55  
56  
57  
58  
59  
60

## Abstract

**Objectives:** Metered dose inhalers (MDIs) contain propellants which are potent greenhouse gases. Many agencies propose a switch to alternative, low global warming potential (GWP) inhalers, such as dry powder inhalers (DPIs). We aimed to analyse the impact on greenhouse gas emissions and drug costs of making this switch.

**Setting:** We studied NHS prescription data from England in 2017 and collated carbon footprint data on inhalers commonly used in England.

**Results:** If MDIs using HFA134a are replaced with the cheapest equivalent DPI, then for every 10% of MDIs changed to DPIs, drug costs decrease by £8.2M annually. However if the brands of DPIs stay the same as 2017 prescribing patterns, for every 10% of MDIs changed to DPIs, drug costs increase by £12.7M annually. Most potential savings are due to less expensive LABA/ICS inhalers. Some reliever inhalers (e.g. Ventolin™) have a carbon footprint over 25kgCO<sub>2</sub>e per inhaler, whilst others use far less HFA134a (e.g. Salamol™) with a carbon footprint of less than 10kgCO<sub>2</sub>e per inhaler. HFA227ea LABA/ICS inhalers (e.g. Flutiform™) have a carbon footprint over 36kgCO<sub>2</sub>e, compared to an equivalent HFA134a combination inhaler (e.g. Fostair™) at less than 20kgCO<sub>2</sub>e. For every 10% of MDIs changed to DPIs, 58ktCO<sub>2</sub>e could be saved annually in England.

**Conclusions:** Switching to DPIs would result in large carbon savings and can be achieved alongside reduced drug costs by using less expensive brands. Substantial carbon savings can be made by using small volume HFA134a MDIs, in preference to large volume HFA134a MDIs, or those containing HFA227ea as a propellant.

### Strengths and limitations of this study

- This article draws together a variety of sources of information to demonstrate significant differences in the global warming potential (GWP) of different inhalers.
- We provide practical solutions to reduce the carbon footprint of metered dose inhalers by prioritising lower volume and HFA134a metered dose inhalers (MDIs) over larger inhalers, or MDIs containing HFA227ea.
- We demonstrate that large reductions in greenhouse gas emissions are possible, alongside reduced drug costs.
- We demonstrate how drug costs could change in various different scenarios with lower greenhouse gas emissions.
- Detailed information about the carbon footprint of all inhalers is not publicly available.

## Introduction

Metered-dose inhalers contain propellants, which are liquefied, compressed gases used as a driving force and an energy source for atomisation of the drug. Chlorofluorocarbons (CFCs), which were used originally, are both potent greenhouse gases (GHGs) and ozone-depleting substances, and were banned under the Montreal Protocol. They have been replaced by two hydrofluoroalkane (HFA) propellants; 1,1,1,2-tetrafluoroethane (HFA134a) and 1,1,1,2,3,3,3-heptafluoropropane (HFA227ea).<sup>1</sup> Currently MDIs contribute an estimated 3.5% of the carbon footprint of the National Health Service in the UK, because HFAs are potent GHGs.<sup>2</sup> The UK has a high proportion of MDI use (70%) compared to less than 50% in the rest of Europe, and only about 10% in Scandinavia.<sup>3</sup> The most commonly used MDIs in the UK contain salbutamol reliever, though there is pressure to reduce excessive reliever use, which has been linked with poor outcomes in asthma, in favour of controller therapies.<sup>4</sup>

Combating climate change has been described as “the greatest public health opportunity of the 21<sup>st</sup> century”.<sup>5</sup> HFAs are used mainly as refrigerants and are controlled under national F-gas regulations, and the Kigali Amendment to the Montreal Protocol. As F-gas use is phased out, HFA MDIs will become a significant proportion of overall HFA use, especially in the UK, because of the high level of use of MDIs.

There have been calls to switch away from HFA MDIs because of their environmental impact.<sup>6</sup> Effective HFA-free alternatives are already available, as DPIs and aqueous mist inhalers. Switching to inhalers with lower GWP is a key part of the NHS Sustainable Development Unit’s strategy.<sup>7</sup> In 2017 the British Thoracic Society recommended that prescribers and patients “consider switching pMDIs to non-propellant devices whenever they are likely to be equally effective”.<sup>8</sup> In May 2018 the UK’s Environmental Audit Committee recommended the NHS set a target of reducing to 50% low-GWP inhalers by 2022.<sup>2</sup> In January 2019 the NHS long term plan proposed pharmacists facilitate switching patients to low GWP inhalers and claimed this could reduce the carbon footprint of the NHS by 4%.<sup>9</sup>

There is patchy information about the carbon footprint of inhalers. Life-cycle analysis of salbutamol MDIs has shown that 98% of its carbon footprint derives from the use-phase, when the propellant is released and this dwarfs manufacturing processes.<sup>10,11,12</sup> This article collates and analyses information on type and volume of emitted propellant.

A significant barrier to switching away from MDIs might be the higher “up-front” price of some DPIs; however, the price of MDIs doesn’t take into account the long-term financial cost of their environmental impact. We investigate a variety of scenarios for altered inhaler prescription patterns in England, and the cost implications of switching to MDIs.

## Methods

### Financial analysis

We used 2017 prescription data from NHS digital website, including the number of inhalers prescribed and net ingredient cost.<sup>13</sup> We separated inhalers into different categories; short-acting beta agonists (SABAs), inhaled corticosteroids (ICS), long-acting beta agonists (LABAs), short-acting muscarinic antagonists (SAMAs), long-acting muscarinic antagonists (LAMAs) and combination devices. ICS were further subdivided into very low, low, medium and high strength as described in BTS/SIGN guidelines.<sup>4</sup> Within these categories we identified high GWP inhalers which contain HFA propellant, and low GWP inhalers which were DPIs and Respimat™ devices. The least expensive low-GWP inhaler in each inhaler category was identified, and the cost and carbon impact of changing inhalers determined in various scenarios. As Salbulin Novoliser™ is rarely used in the UK we added a scenario using Salbutamol Easyhaler™. For medium strength ICS+LABA combination inhalers we included scenarios for the cheapest once daily DPI Relvar Ellipta™, and the cheapest twice-daily dosing inhaler Fostair 100/6 Nexthaler™, which is also licensed for use as a maintenance and reliever therapy inhaler. Some discontinued inhalers and those prescribed in very low numbers (less than 500 a year) were excluded from the analysis.

### **Carbon footprint**

Information on the amount of HFA propellant in MDIs is not publically available, so alternative sources of information were sought. Studies have estimated the contents of MDIs by weighing empty and full inhalers, and patents also provide some data. The carbon footprint was estimated by multiplying the estimated weight of HFA propellant by its 100 year GWP.

We identified the 20 most commonly prescribed MDIs using NHS prescribing data.<sup>14</sup> We searched google patents search engine (<https://patents.google.com/>) using the search terms “inhaler name” or “drug name” AND HFA or HFA134a or HFA227ea. Links and citations from relevant results were followed. We also reviewed data from the Montreal Protocol Medical Technical Options Committee.<sup>15</sup>

### **Patient and Public Involvement**

A prior survey conducted in Hertfordshire, UK by one of the authors (AW) found that eighty six percent of patients agreed that both cost and carbon footprint are important factors to consider when changing inhalers.<sup>16</sup>

## **Results**

### **Financial implications**

By analysing NHS prescription data, we modelled how prescription costs would change in various different prescription scenarios.

In Model 1, we replaced MDIs with DPIs in the same proportions that brands of DPIs had been prescribed in England 2017, which we called “proportional replacement”. For example if three DPI inhalers (A, B and C) made up 50%, 30% and 20% of the DPIs in that category, then proportional replacement would switch

1  
2  
3 50% of the MDIs to DPI inhaler A, 30% to B and 20% to C. The number of MDIs declines and DPIs  
4 increase, whilst the proportions of each DPI used stays the same. In this scenario for every 10% of MDIs  
5 changed the total cost *increased* by £12.7M annually.  
6  
7

8 In Model 2, we replaced MDIs with the cheapest available equivalent DPI. In this scenario for every 10%  
9 of MDIs changed total cost *decreased* by £8.2M annually. We saw different price changes for different  
10 types of inhalers. We modelled several alternative scenarios described below and in table 1.  
11  
12

13 *Short-acting beta agonists (SABA; salbutamol)*. In 2017 the least expensive MDI salbutamol was £1.88  
14 versus the least expensive DPI salbutamol Salbulin Novolizer™ at £3.36 for 200-dose inhaler. Costs  
15 therefore rose £2.02M for every 10% of MDIs changed to the cheapest DPI. However the Salbulin  
16 Novolizer™ is rarely used in the UK, with only 1,015 prescriptions in 2017, so we modelled an alternative  
17 scenario in which we changed MDIs to Salbutamol Easyhaler™ instead (£3.85 per inhaler). In this model  
18 costs rose £3.01M for every 10% of inhalers changed.  
19  
20  
21  
22  
23

24 *Long-acting beta agonists (LABA)*. The least expensive LABA in 2017 was Formoterol Easyhaler™, which  
25 is similarly priced to the least expensive MDI LABA at £25.37 per inhaler. We found savings of £1.02M  
26 for every 10% of MDIs changed. For proportional replacement, costs increased by £1.47M for every 10%  
27 of MDIs changed.  
28  
29  
30

31 *Inhaled corticosteroids (ICS)*. We divided ICS inhalers as described in BTS/SIGN guidance into very low,  
32 low, medium and high strength inhalers.<sup>4</sup> We identified the least expensive equivalent DPI ICS in each  
33 category. These were Flixotide 50 Accuhaler™ (£8.54 per inhaler) one inhalation BD for very low strength,  
34 Beclometasone 200 Easyhaler™ (£16.85 per inhaler) one inhalation BD for low strength and two  
35 inhalations bd for medium strength, Budesonide 400 Easyhaler™ (£20.39 per inhaler) two inhalations BD  
36 for high strength. We found costs increased slightly; £207K for every 10% of MDIs switched to the  
37 cheapest DPI. For proportional replacement costs rose £8.25M for every 10% of MDIs changed.  
38  
39  
40  
41  
42

43 *LABA/ICS combination inhalers*. We divided inhalers into low, medium and high strength inhaled  
44 corticosteroids. The least expensive DPI inhalers were Seretide 100 Accuhaler™ (£23.89 per inhaler),  
45 Relvar 92/22 Ellipta™ (£25.31 per inhaler) and Fostair 200/6 Nexthaler™ (£33.28 per inhaler) respectively.  
46 We saw large cost savings; £10.0M saved for every 10% of MDIs switched to the least expensive DPI  
47 LABA/ICS. Because Relvar™ is a once-daily inhaler which would result in a change in dosing regimen for  
48 many patients, and is not licensed for maintenance and reliever therapy in asthma patients, we modelled an  
49 alternative scenario whereby we switched medium strength LABA/ICS combination inhalers to Fostair  
50 100/6 Nexthaler™ (£33.42 per inhaler). In this scenario we saw more modest cost savings of £6.25M for  
51 every 10% of MDIs switched. For “proportional” replacement costs fell £668K for every 10% of MDIs  
52 changed.  
53  
54  
55  
56  
57  
58  
59  
60

1  
2  
3 *Short and long-acting muscarinic antagonists and LAMA/LABA combination inhalers.* We didn't change  
4 these inhalers in our model as all SAMAs are MDI and all LAMAs and LAMA+LABA devices are DPI or  
5 aqueous mist inhalers. There are potential clinical and environmental benefits from switching SAMA to  
6 LAMA inhalers.<sup>17</sup>  
7  
8

9  
10 *LABA/LAMA/ICS inhalers.* Two of these "triple" inhalers became available for the first time in 2017, one  
11 MDI (Trimbow™ at £47.42) and one DPI (Trelegy™ at £58.10 per inhaler). In 2017 5,211 of these inhalers  
12 were prescribed and the cost of switching from MDI to DPI was £555K for every 10% of inhalers  
13 switched.  
14  
15

### 16 **Greenhouse gas analysis**

17  
18 The carbon footprint of commonly prescribed inhalers is summarised in table 2. All Salbutamol MDIs  
19 use HFA134a, with a GWP of 1,300. There are two types of salbutamol MDIs, one a small volume  
20 MDI containing alcohol as a co-solvent, which requires less HFA propellant than the large volume  
21 alcohol-free type.<sup>18</sup> A study comparing a large volume inhaler Ventolin™ (GSK) with small volume  
22 Salamol™ inhaler found the weight of the contents (mainly HFA134a propellant) to be 17.32 and  
23 7.88g respectively. A GSK patent for salbutamol MDI shows inhalers containing 18.2g and 19.8g of  
24 HFA134a.<sup>19,20</sup> GSK published a Carbon Trust certified carbon footprint analysis which estimated  
25 Ventolin™ to have a carbon footprint of 28kgCO<sub>2</sub>e/inhaler, far greater than a small volume inhaler  
26 (Proventil™) at around 10kgCO<sub>2</sub>e/inhaler.<sup>21,10</sup>  
27  
28  
29  
30  
31  
32  
33

34 For SAMAs we used manufacturer's product carbon footprint data on Atrovent™ which has a product  
35 carbon footprint of 14.59kg.<sup>12</sup>  
36  
37

38 For ICS, comparison of two patents for beclometasone inhalers, suggest that those with alcohol use  
39 around half the HFA134a propellant (12.3g with alcohol versus 20g of HFA134a alone) of  
40 HFA134a.<sup>22,23</sup>  
41  
42

43 For LABA/ICS combination inhalers, one patent for Fluticasone/Salmeterol MDI (Seretide™)  
44 contained 18.2g of HFA134a.<sup>19</sup> GSK published carbon footprint estimates 19kgCO<sub>2</sub>e/inhaler for their  
45 LABA, ICS/LABA and LABA MDIs. However, an FDA report on the US Advair™ brand of  
46 Fluticasone/Salmeterol MDI stated the inhaler has a net weight of just 12g/inhaler.<sup>24</sup>  
47  
48  
49

50 Two LABA/ICS MDIs (Symbicort™ MDI and Flutiform™) use HFA227ea as a propellant, which  
51 has higher GWP of 3,320. A patent for Flutiform™ indicates it contains 11g (+/-0.5g) of HFA227ea,  
52 resulting in the largest carbon footprint of any inhaler at 36.5kgCO<sub>2</sub>e/inhaler.<sup>25</sup>  
53  
54  
55

56 Currently both LAMA alone, and LAMA/LABA combinations are exclusively available in the UK as  
57 DPIs. There is only one triple ICS/LAMA/LABA combination available in an MDI, and no data on  
58 propellant volume could be found (Trimbow™).  
59  
60



### DPIs and aqueous mist inhalers

DPIs and aqueous mist inhalers (such as Respimat™) do not contain HFAs. The Medical Technical Options Committee of the United Nations estimated the carbon footprint of a DPI to be between 1.5kg and 6kg CO<sub>2</sub>e for a 200-dose inhaler (7.5g-30g/dose) but most DPIs contain far fewer than 200 doses.<sup>15</sup> GSK's Carbon Trust-verified analysis of their DPIs (containing one month's treatment) found a carbon footprint of slightly less than one kilogram CO<sub>2</sub>e/inhaler.<sup>21</sup> Product carbon footprint analysis of Spiriva Respimat™ published by the manufacturers found it to have a carbon footprint of 780gCO<sub>2</sub>e, but potentially lower if refill cartridges are used.<sup>12</sup> For our analyses we assumed a carbon footprint of 1kg CO<sub>2</sub>e per DPI, and used the mid-point of the range of carbon footprints for each class of MDI.

We estimated the total carbon footprint of MDIs prescribed in the community in England in 2017 to be 635kt CO<sub>2</sub>e. For every 10% of HFA MDIs changed to low-GWP devices 58ktCO<sub>2</sub>e could be saved annually. Reaching the EAC target of 50% of inhalers being low-GWP devices by 2022, would save 288ktCO<sub>2</sub>e every year. Reducing the proportion of high-GWP devices to 10%, as seen in Sweden, would result in carbon savings 519ktCO<sub>2</sub>e every year.

### Discussion

If prescribers switch from high GWP to the least expensive low GWP options within each therapeutic category, major financial savings could be made alongside large carbon reductions. Most of the savings are seen by switching from more expensive LABA/ICS MDIs to less expensive DPIs. These potential savings would exceed the cost of switching the larger volume of Salbutamol MDIs to DPIs, because the incremental cost per salbutamol inhaler (less than £2/inhaler) is much lower.

A second option in which prescribers switch from MDI to the DPIs according to the current proportions of brand prescribing, would be more expensive. Neither clinicians nor formularies would likely support a switch to equivalent inhalers which were more expensive. A third option in which prescribers switch from an MDI to DPI for the same branded LABA/ICS combination (e.g. Seretide™ or Fostair™) is generally either cost neutral or less expensive.

There is recent focus on cost-effectiveness, which takes into account ease of use, dose frequency and other "softer" factors that would encourage adherence, impact clinical outcomes and in turn economic cost in the real world. Poor inhaler technique is very common and greatly limits the effectiveness of inhaled medications. The most recent large meta-analysis identified fewer errors overall with DPIs, even when MDI users had spacers.<sup>26</sup> The Salford lung study was a large, pragmatic randomised trial that showed improved clinical outcomes in asthma and COPD patients assigned to once daily Relvar™ DPI instead of their usual inhaler (which was an MDI in 68%).<sup>27,28</sup> One historical matched cohort study found better asthma control in patients initiated on an MDI compared to DPI, but this study only compared Seretide

1  
2  
3 Evohaler and Accuhaler.<sup>29</sup> A similar matched cohort study demonstrated asthma patients can be switched  
4 from other ICS inhalers to the Easyhaler™ with no reduction in clinical effectiveness or change in cost.<sup>30</sup>  
5  
6 Another similar study found better asthma control and fewer exacerbations in patients starting or  
7 increasing strength of DPIs or breath-actuated inhalers compared to pMDIs.<sup>31</sup> A further benefit of DPIs is  
8 that they use a dose counter, whereas Salbutamol and ICS MDIs generally do not. Patients often cannot  
9 determine when their MDIs are empty and either throw away half full inhalers, or conversely continue to  
10 use empty inhalers unknowingly.<sup>32</sup>  
11  
12  
13

14 Our cost analysis has a number of limitations. Our data only includes community prescriptions in England;  
15 hospital prescriptions are not included. However, patients receiving prescriptions from hospital are likely  
16 to have more severe disease requiring combination inhalers, so the potential cost savings could be even  
17 greater. Our models do not include the impact of future changes in prescribing practice such as the recent  
18 introduction of triple LAMA/LABA/ICS inhalers.  
19  
20  
21  
22

23 The MDIs assessed were found to have a wide range of carbon footprints; 10-37 times that of a DPI. The  
24 UK government's DEFRA report incorrectly assumes that all inhalers contain 12g of propellant. Even  
25 among MDIs, those containing HFA227ea propellant or large volume HFA134a propellant have twice the  
26 carbon footprint or more compared to small volume MDIs. Around 6.5 million large volume MDIs for  
27 salbutamol were prescribed in England in 2016, and switching these to small volume MDIs could save  
28 159ktCO<sub>2</sub>e in England alone, with little clinical or patient impact.<sup>33</sup> Our findings provide a potentially  
29 more accurate model that could be transferred to other countries wanting to monitor and regulate MDIs in  
30 relation to carbon footprint.  
31  
32  
33  
34  
35

36 Inhaler recycling has the potential to reduce the environmental impact of inhalers through recovery of  
37 propellant, although so far, uptake has been very low with less than 1% of MDIs recovered and of little  
38 measurable impact in climate terms.<sup>11</sup> A study of inhalers returned for recycling showed that 48% of doses  
39 remain in MDIs, compared to just 27% in DPIs.<sup>34</sup>  
40  
41  
42  
43

44 An important question is whether to switch to DPIs now, or wait for reformulated MDIs with novel low  
45 GWP propellants. Three low GWP propellants have been considered, isobutane, HFA152a and HFO  
46 1234ea. An isobutane programme has been underway for a decade in Argentina, but not yet been  
47 commercialised. HFA152a has a lower carbon footprint (one tenth of HFA134a) and HFO1234ea zero,  
48 but both remain at early stage development.<sup>1</sup> Very large clinical trials will be required to establish their  
49 safety, alone and then in combination with every moiety that uses them. Transition to a novel propellant(s)  
50 would likely take a decade, although this may be cost-effective from a worldwide perspective, especially in  
51 developing countries.  
52  
53  
54  
55

56 Several papers assert that some patients are unable to generate the inspiratory flows necessary to activate  
57 DPIs, particularly during exacerbations.<sup>35-36</sup> However, 93% of prescriptions for LAMA or LAMA/LABA  
58 devices for COPD in England are for DPIs, suggesting clinicians believe the vast majority of patients can  
59  
60

1  
2  
3 use a DPI effectively.<sup>14</sup> In contrast, 94% of SABA prescriptions are for MDIs leading to a confusing  
4 mixture of inhalation techniques.<sup>14</sup> COPD patients whose inhaler devices use the same inhalation  
5 technique show better clinical outcomes than those prescribed devices requiring different techniques.<sup>37</sup>  
6 One small study examined patients' ability to use MDIs and DPIs effectively during the course of an  
7 exacerbation and found best results from an Accuhaler™ DPI which has medium resistance but is effective  
8 at relatively flow peak inspiratory flow rates of 30L/min.<sup>38</sup> Switching to DPI SABAs could potentially lead  
9 to a simplification of inhalation technique, an improvement in care and a reduction in carbon footprint.  
10  
11  
12  
13

14  
15 Patients care about the carbon footprint of their inhalers. One survey of inhaler users found that 78% rated  
16 carbon footprint as important; equally important to them as financial cost.<sup>16</sup> Changing one MDI device to a  
17 DPI could save 150kg to 400kg CO<sub>2</sub>e annually; roughly equivalent to installing wall insulation at home,  
18 recycling, or cutting out meat.<sup>39</sup> These are individual actions that many environmentally concerned  
19 individuals are keen to take.  
20  
21  
22

23  
24 Our carbon footprint results for England are consistent with other studies of MDIs in the UK (which  
25 included Scotland, Wales and Northern Ireland), which show that they contribute approximately a megaton  
26 of CO<sub>2</sub>e to global greenhouse gas emissions. Climate change is estimated to kill 250,000 people annually  
27 by 2030, particularly vulnerable people in financially poor countries.<sup>40</sup> Physicians should not shy away  
28 from these issues, but reaching shared decisions with patients will be challenging and tools to assist this  
29 would be valuable.  
30  
31  
32

### 33 **Conclusions**

34  
35  
36 Climate change is a huge and present threat to health which will disproportionately impact the poorest and  
37 most vulnerable on the planet, including people with pre-existing lung disease. Every effort must be made  
38 to minimise greenhouse gas release to protect current and future generations from the worst effects of  
39 climate change.  
40  
41  
42

43 Switching to low GWP inhalers can be achieved whilst making financial savings in terms of drug costs.  
44 Patients, prescribers and guideline authors should carefully consider the carbon footprint of these inhalers  
45 and where they are likely to be equally effective, prioritise low GWP inhalers.  
46  
47

48 Where MDIs are considered necessary, other steps can be taken immediately to reduce their environmental  
49 impact. Smaller volume HFA134a inhalers should be prioritised over larger volume or HFA227ea-  
50 containing inhalers, manufacturers should consider phasing out the use of HFA227ea, and patients,  
51 manufacturers and clinicians should publicise and encourage inhaler recycling.  
52  
53  
54  
55  
56  
57  
58  
59  
60

## References

- 1 Myrdal PB, Sheth P, Stein SW. Advances in Metered Dose Inhaler Technology: Formulation Development. *AAPS PharmSciTech* 2014; **15**: 434–55.
- 2 Creagh M, Labour MP, Clark C, Conservative MP. Environmental Audit Committee UK Progress on reducing F-gas Emissions. 2018.
- 3 Lavorini F, Corrigan CJ, Barnes PJ, *et al*. Retail sales of inhalation devices in European countries: So much for a global policy. *Respir Med* 2016; **105**: 1099–103.
- 4 BTS/SIGN British Guideline for the management of asthma, 2016, SIGN 153. <http://www.sign.ac.uk/sign-153-british-guideline-on-the-management-of-asthma.html>.
- 5 Wang H, Horton R. Tackling climate change: the greatest opportunity for global health. *Lancet* 2015. DOI:10.1016/S0140-6736(15)60931-X.
- 6 Hillman T, Mortimer F, Hopkinson NS. Inhaled drugs and global warming: time to shift to dry powder inhalers. *BMJ* 2013; **346**. <http://www.bmj.com/content/346/bmj.f3359.abstract>.
- 7 NHS Sustainable Development Unit. Sustainable Development in the Health and Care System: Health Check 2016. 2016; : 16.
- 8 British Thoracic Society. THE ENVIRONMENT AND LUNG HEALTH POSITION STATEMENT • January 2017. 2017. <https://www.brit-thoracic.org.uk/document-library/audit-and-quality-improvement/environment-and-lung-health/the-environment-and-lung-health/>.
- 9 The NHS Long Term Plan. London, 2019 [www.longtermplan.nhs.uk](http://www.longtermplan.nhs.uk).
- 10 Goulet B, Olson L, Mayer B. A Comparative Life Cycle Assessment between a Metered Dose Inhaler and Electric Nebulizer. *Sustainability* 2017; **9**: 1725.
- 11 GSK. Complete the cycle – how we’re recycling inhalers. 2018. <https://www.gsk.com/en-gb/behind-the-science/how-we-do-business/complete-the-cycle-how-we-re-recycling-inhalers/> (accessed July 18, 2018).
- 12 Hänsel M, Bambach T, Wachtel H. Reduced environmental impact of a reusable soft mist inhaler. *Eur Respir J* 2018; **52**: PA1021.
- 13 NHS England. NHS digital. 2017. <https://digital.nhs.uk/prescribing> (accessed July 17, 2018).
- 14 NHS Business Services Authority. [https://www.nhsbsa.nhs.uk/sites/default/files/2017-10/PCA\\_Aug\\_17.xlsx](https://www.nhsbsa.nhs.uk/sites/default/files/2017-10/PCA_Aug_17.xlsx) (accessed Aug 21, 2018).
- 15 Montreal Protocol On Substances that Deplete the Ozone Layer Report of the UNEP Medical Technical Options Committee 2014 Assessment. Nairobi, Kenya, 2014.

- 1  
2  
3 16 Liew KL, Wilkinson A. P280 How do we choose inhalers? patient and physician perspectives on  
4 environmental, financial and ease-of-use factors. *Thorax* 2017; **72**: A235 LP-A237.  
5  
6  
7 17 Cheyne L, Irvin-Sellers MJ, White J. Tiotropium versus ipratropium bromide for chronic obstructive  
8 pulmonary disease. *Cochrane Database Syst Rev* 2015. DOI:10.1002/14651858.CD009552.pub3.  
9  
10 18 Sellers WFS. Asthma pressurised metered dose inhaler performance: propellant effect studies in  
11 delivery systems. *Allergy Asthma Clin Immunol* 2017; **13**: 30.  
12  
13  
14 19 Akehurst RA, Taylor AJ, Wyatt DA. Aerosol formulations containing propellant 134a and fluticasone  
15 propionate. 1997; published online Aug 19. <https://www.google.com/patents/US5658549>.  
16  
17  
18 20 Ian I, Ashurst C, Herman CS, Li-bovet L, Riebe MT. United States Patent ( 19 ). 2000.  
19  
20 21 Atherton M. ENVIRONMENTAL IMPACT OF INHALERS. 2017. [https://www.greatermanchester-](https://www.greatermanchester-ca.gov.uk/download/meetings/id/2423/environmental_impact_of_inhalers)  
21 [ca.gov.uk/download/meetings/id/2423/environmental\\_impact\\_of\\_inhalers](https://www.greatermanchester-ca.gov.uk/download/meetings/id/2423/environmental_impact_of_inhalers) (accessed Aug 27, 2018).  
22  
23  
24 22 Brambilla G, Johnson R, Lewis DA. Aerosol inhalation device. 2014; published online March 6.  
25 <https://www.google.com/patents/WO2014033057A1?cl=en>.  
26  
27  
28 23 Brown M, Jones S, Martin G. Metered dose inhalation preparations of therapeutic drugs. 2010.  
29 <https://patents.google.com/patent/WO2005055985A1/en?q=qvar+AND+HFA134&oq=qvar+AND+HF>  
30 [A134](https://patents.google.com/patent/WO2005055985A1/en?q=qvar+AND+HFA134&oq=qvar+AND+HF) (accessed Aug 17, 2018).  
31  
32  
33 24 (DMETS) D of ME and TS. CENTER FOR DRUG EVALUATION AND RESEARCH  
34 APPLICATION NUMBER: NDA 21-254. 2006  
35 [https://www.accessdata.fda.gov/drugsatfda\\_docs/nda/2006/021254s000\\_NameR.pdf](https://www.accessdata.fda.gov/drugsatfda_docs/nda/2006/021254s000_NameR.pdf).  
36  
37  
38 25 Mueller-Walz R, Fueg LM. Medicinal aerosol formulations. 2014; published online Oct 23.  
39 <https://www.google.com/patents/US20140314684>.  
40  
41  
42 26 Sanchis J, Gich I, Pedersen S. Systematic review of errors in inhaler use: Has patient technique  
43 improved over time? *Chest* 2016; **150**: 394–406.  
44  
45  
46 27 Woodcock A, Vestbo J, Bakerly ND, *et al*. Effectiveness of fluticasone furoate plus vilanterol on asthma  
47 control in clinical practice: an open-label, parallel group, randomised controlled trial. *Lancet* 2017; **390**:  
48 2247–55.  
49  
50  
51 28 Vestbo J, Leather D, Diar Bakerly N, *et al*. Effectiveness of Fluticasone Furoate–Vilanterol for COPD  
52 in Clinical Practice. *N Engl J Med* 2016; **375**: 1253–60.  
53  
54  
55 29 Price D, Roche N, Christian Virchow J, *et al*. Device type and real-world effectiveness of asthma  
56 combination therapy: An observational study. *Respir Med* 2011; **105**: 1457–66.  
57  
58  
59 30 Price DB, Rigazio A, Small MB, Ferro TJ. Historical cohort study examining comparative effectiveness  
60 of albuterol inhalers with and without integrated dose counter for patients with asthma or chronic

- 1  
2  
3 obstructive pulmonary disease. *J Asthma Allergy* 2016; **Volume 9**: 145–54.  
4  
5  
6 31 Price D, Haughney J, Sims E, *et al*. Effectiveness of inhaler types for real-world asthma management:  
7 retrospective observational study using the GPRD. *J Asthma Allergy* 2011; **4**: 37–47.  
8  
9 32 Conner JB, Buck PO. Improving Asthma Management: The Case for Mandatory Inclusion of Dose  
10 Counters on All Rescue Bronchodilators. *J Asthma* 2013; **50**: 658–63.  
11  
12 33 Williamson IJ, Reid A, Monie RD, Fennerty AG, Rimmer EM. Generic inhaled salbutamol versus  
13 branded salbutamol. A randomised double-blind study. *Postgrad Med J* 1997; **73**: 156–8.  
14  
15 34 NHS Grampian audit. [www.dontwasteabreath.com/view/facts](http://www.dontwasteabreath.com/view/facts) (accessed March 5, 2018).  
16  
17 35 Al Showair RA, Tarsin WY, Assi KH, Pearson SB, Chrystyn H. Can all patients with COPD use the  
18 correct inhalation flow with all inhalers and does training help? *Respir Med* 2007; **101**.  
19 DOI:10.1016/j.rmed.2007.06.008.  
20  
21 36 Adachi Y, Adachi YS, Itazawa T, Yamamoto J, Murakami G, Miyawaki T. Measurement of peak  
22 inspiratory flow rates with an in-check meter to identify preschool children’s ability to use dry powder  
23 inhalers; Diskus and Turbuhaler. *J Allergy Clin Immunol* 2018; **113**: S114.  
24  
25 37 Bosnic-Anticevich S, Chrystyn H, Costello RW, *et al*. The use of multiple respiratory inhalers requiring  
26 different inhalation techniques has an adverse effect on COPD outcomes. *Int J Chron Obstruct Pulmon*  
27 *Dis* 2017; **12**: 59–71.  
28  
29 38 Broeders MEAC, Molema J, Hop WCJ, Vermue NA, Folgering HTM. The course of inhalation profiles  
30 during an exacerbation of obstructive lung disease. *Respir Med* 2004; **98**: 1173–9.  
31  
32 39 Wynes S, Nicholas KA. The climate mitigation gap: education and government recommendations miss  
33 the most effective individual actions. *Environ* 2017; **12**: 1–9.  
34  
35 40 Climate change and health. World Heal. Organ. 2018. [http://www.who.int/en/news-room/fact-](http://www.who.int/en/news-room/fact-sheets/detail/climate-change-and-health)  
36 [sheets/detail/climate-change-and-health](http://www.who.int/en/news-room/fact-sheets/detail/climate-change-and-health).  
37  
38 41 Thompson J. A process for the production and screening of materials for use in pharmaceutical aerosol  
39 formulations. 2017. <https://patents.google.com/patent/EP1588698A2/> (accessed Aug 4, 2018).  
40  
41 42 GODFREY APGSK, WARBY RB. Metered dose inhaler for salmeterol xinafoate. 2003; published  
42 online Sept 17. <https://www.google.co.uk/patents/EP1343550A1?cl=en>.  
43  
44  
45  
46  
47  
48  
49  
50  
51  
52  
53  
54  
55  
56  
57  
58  
59  
60

**Table 1 Financial implications of switching from MDIs to DPIs**

| Inhaler type (and most common example)      | Number prescribed in 2017 | Total cost of this type of inhaler (£) | Cheapest DPI alternative                     | Cost change with proportional replacement (per 10%) | Cost change with cheapest replacement (per 10%) |
|---------------------------------------------|---------------------------|----------------------------------------|----------------------------------------------|-----------------------------------------------------|-------------------------------------------------|
| SABA (salbutamol MDI)                       | 21,930,625                | £58,195,683.24                         | Salbutamol100<br>Easyhaler™                  | £3,068,201.99                                       | £2,021,405.23                                   |
| LABA (Salmeterol 25 MDI)                    | 700,145                   | £25,250,958.95                         | Formoterol<br>Easyhaler™                     | £1,474,723.02                                       | -£1,018,957.21                                  |
| Very low dose ICS (Clenil modulite™ 50)     | 221,836                   | £82,931,128.16                         | Flixotide<br>Accuhaler™ 50, 1 inh<br>BD      | £875,534.13                                         | £ 875,534.13                                    |
| Low dose ICS (Clenil modulite™ 100)         | 3,874,077                 | £36,581,577.50                         | Beclometasone<br>Easyhaler™ 200, 1<br>inh BD | £2,461,791.16                                       | -£213,579.26                                    |
| Medium dose ICS (Clenil modulite™ 200)      | 1,683,466                 | £34,611,159.90                         | Beclometasone<br>Easyhaler™ 200, 2<br>inh BD | £3,828,332.15                                       | -£628,752.90                                    |
| High dose ICS (Clenil modulite™ 250)        | 287,604                   | £7,923,785.74                          | Budesonide<br>Easyhaler™ 400, 2<br>inh BD    | £1,084,787.73                                       | £173,464.97                                     |
| Low dose ICS+LABA (Seretide 50 Evohaler™)   | 1,181,941                 | £32,582,876.16                         | Duoresp Spiromax™<br>160/4.5, 1 inh bd       | £749,613.82                                         | £121,485.45                                     |
| Medium dose ICS+LABA (Fostair™ 100/6 MDI)   | 9,467,562                 | £373,045,012.90                        | Relvar Ellipta™ 92/,<br>1 inh OD             | £3,124,173.89                                       | -£4,876,327.15                                  |
|                                             |                           |                                        | OR Fostair 100/6<br>Nexthaler™ 2 inh BD      |                                                     | OR -<br>£1,123,070.10                           |
| High dose ICS+LABA (Seretide 250 Evohaler™) | 244,682                   | £184,212,379.80                        | Fostair 200/6<br>Nexthaler™ 2 inh BD         | -£6,454,411.73                                      | -£5,248,427.76                                  |
| ICS+LAMA+LABA (Trimbow™)                    | 5,211                     | £247,464.50                            | Trelegy Ellipta™                             | £ 552,801.25                                        | £552,801.25                                     |

Table 2 Indicative carbon footprint of commonly prescribed MDIs by inhaler class

| Class of inhaler (and most commonly prescribed inhaler in this class) | Indicative amount of HFA propellant per inhaler (g) | Global warming potential of HFA (over 100 years) | Carbon footprint of inhaler (g CO <sub>2</sub> e) (range and midpoint in brackets) | Actuations per inhaler | Carbon footprint per actuation (g CO <sub>2</sub> e)  | Source                                                                                                           |
|-----------------------------------------------------------------------|-----------------------------------------------------|--------------------------------------------------|------------------------------------------------------------------------------------|------------------------|-------------------------------------------------------|------------------------------------------------------------------------------------------------------------------|
| Small volume SABA (e.g. Salamol™)                                     | 6.68-8.5                                            | 1,300                                            | 8,680-11,050 (9,870)                                                               | 200                    | 43.4-55.3 (48.6 in life cycle analysis <sup>7</sup> ) | Published carbon footprint study. <sup>9</sup> Inhaler performance study <sup>18</sup> patent <sup>41</sup>      |
| Large volume SABA (e.g. Ventolin™)                                    | 17.32-19.8                                          | 1,300                                            | 22,520-28,000 (25,260)                                                             | 200                    | 112-129                                               | Inhaler performance study <sup>18</sup> , patents <sup>19,20</sup> , independently certified study <sup>21</sup> |
| SAMA (e.g. Atrovent™)                                                 | 11                                                  | 1,300                                            | 14.3kg (total product carbon footprint 14.59kg)                                    | 200                    | 71.5                                                  | Product carbon footprint published by manufacturer <sup>12</sup>                                                 |
| LABA (e.g. Salmeterol)                                                | 12                                                  | 1,300                                            | 15,600-19,000 (17,300)                                                             | 120                    | 130                                                   | Patent <sup>42</sup> , independent study <sup>21</sup>                                                           |
| ICS (e.g. Clenil™)                                                    | 11.32-20                                            | 1,300                                            | 14,700-26,000 (20,350)                                                             | 200                    | 73.5-130                                              | Patents <sup>22,23</sup> , independently certified study <sup>21</sup>                                           |
| HFA134a ICS/LABA (e.g. Fostair™)                                      | 12-18.2                                             | 1,300                                            | 15,600-23,700 (19,650)                                                             | 120                    | 130-197                                               | FDA report, <sup>24</sup> Patent, <sup>19</sup> independently certified study <sup>21</sup>                      |
| HFA 227ea ICS/LABA (e.g. Flutiform™)                                  | 11                                                  | 3,320                                            | 36,500                                                                             | 120                    | 295                                                   | Patent <sup>25</sup>                                                                                             |



## Declaration of Interest

AJKW – no conflict of interest to declare

RB – no conflict of interest to declare

IS - no conflict of interest to declare

JS - Dr. Smith reports personal fees from Trumpington Street Medical Practice, grants and personal fees from NHS England , personal fees from World Health Organisation Europe, personal fees from Better Value Healthcare Ltd, personal fees from Cambridgeshire County Council , personal fees from University of Cambridge, outside the submitted work; and he is married to a practicing GP in Cambridgeshire.

## Data Sharing

Extra data is available by emailing [alex.wilkinson2@nhs.net](mailto:alex.wilkinson2@nhs.net)

## Exclusive licence

The Corresponding Author has the right to grant on behalf of all authors and does grant on behalf of all authors, a worldwide licence (<http://www.bmj.com/sites/default/files/BMJ%20Author%20Licence%20March%202013.doc>) to the Publishers and its licensees in perpetuity, in all forms, formats and media (whether known now or created in the future), to i) publish, reproduce, distribute, display and store the Contribution, ii) translate the Contribution into other languages, create adaptations, reprints, include within collections and create summaries, extracts and/or, abstracts of the Contribution and convert or allow conversion into any format including without limitation audio, iii) create any other derivative work(s) based in whole or part on the on the Contribution, iv) to exploit all subsidiary rights to exploit all subsidiary rights that currently exist or as may exist in the future in the Contribution, v) the inclusion of electronic links from the Contribution to third party material where-ever it may be located; and, vi) licence any third party to do any or all of the above. All research articles will be made available on an open access basis (with authors being asked to pay an open access fee—see <http://www.bmj.com/about-bmj/resources-authors/forms-policies-and-checklists/copyright-open-access-and-permission-reuse>). The terms of such open access shall be governed by a [Creative Commons](#) licence—details as to which Creative Commons licence will apply to the research article are set out in our worldwide licence referred to above.

## Authorship statement

All authors meet the required criteria for authorship:

- Substantial contributions to the conception or design of the work; or the acquisition, analysis, or interpretation of data for the work; AND
- Drafting the work or revising it critically for important intellectual content; AND
- Final approval of the version to be published; AND
- Agreement to be accountable for all aspects of the work in ensuring that questions related to the accuracy or integrity of any part of the work are appropriately investigated and resolved.

## Transparency Declaration

1  
2  
3 The manuscript is an honest, accurate, and transparent account of the study being reported; that no  
4 important aspects of the study have been omitted; and that any discrepancies from the study as planned  
5 (and, if relevant, registered) have been explained.  
6

### 7 **Contributorship**

8  
9 AJKW - helped design the study, collected and analysed the data and wrote the manuscript.  
10

11 JB - helped design the study, collected and analysed the data and revised the manuscript.  
12

13 IS – helped analyse the data and revise the manuscript.  
14

15 JS- helped design the study, collected and analysed the data and revised the manuscript.  
16

### 17 **Acknowledgements**

18  
19 Many thanks to Professor Ashley Woodcock of Manchester University for comments and help refining the  
20 manuscript.  
21

### 22 **Funding**

23  
24 This research received no specific grant from any funding agency in the public, commercial or not-  
25 for-profit sectors’  
26  
27  
28  
29  
30  
31  
32  
33  
34  
35  
36  
37  
38  
39  
40  
41  
42  
43  
44  
45  
46  
47  
48  
49  
50  
51  
52  
53  
54  
55  
56  
57  
58  
59  
60

# BMJ Open

## The costs of switching to low global-warming potential inhalers. An economic and carbon footprint analysis of NHS prescription data in England.

|                                 |                                                                                                                                                                                                                                                                                                                                                           |
|---------------------------------|-----------------------------------------------------------------------------------------------------------------------------------------------------------------------------------------------------------------------------------------------------------------------------------------------------------------------------------------------------------|
| Journal:                        | <i>BMJ Open</i>                                                                                                                                                                                                                                                                                                                                           |
| Manuscript ID                   | bmjopen-2018-028763.R1                                                                                                                                                                                                                                                                                                                                    |
| Article Type:                   | Original research                                                                                                                                                                                                                                                                                                                                         |
| Date Submitted by the Author:   | 05-Jul-2019                                                                                                                                                                                                                                                                                                                                               |
| Complete List of Authors:       | Wilkinson, Alexander; East and North Hertfordshire NHS Trust, Respiratory Department<br>Braggins, Rory; University of Cambridge Department of Public Health and Primary Care, School of Clinical Medicine<br>Steinbach, Ingeborg; Centre for Sustainable Healthcare<br>Smith, James; University of Cambridge Department of Public Health and Primary Care |
| <b>Primary Subject Heading</b>: | Respiratory medicine                                                                                                                                                                                                                                                                                                                                      |
| Secondary Subject Heading:      | Health economics                                                                                                                                                                                                                                                                                                                                          |
| Keywords:                       | Asthma < THORACIC MEDICINE, HEALTH ECONOMICS, RESPIRATORY MEDICINE (see Thoracic Medicine), Adult thoracic medicine < THORACIC MEDICINE, Chronic airways disease < THORACIC MEDICINE                                                                                                                                                                      |
|                                 |                                                                                                                                                                                                                                                                                                                                                           |

SCHOLARONE™  
Manuscripts

1  
2  
3 **The costs of switching to low global-warming potential inhalers. An economic and**  
4 **carbon footprint analysis of NHS prescription data in England.**  
5  
6  
7

8 **Corresponding Author**  
9

10 Alexander JK Wilkinson, Respiratory Department, East and North Hertfordshire NHS  
11 Trust, Lister Hospital, Corey's Mill Lane, Stevenage, SG1 4AB, UK  
12  
13

14  
15  
16 Email: [Alex.wilkinson2@nhs.net](mailto:Alex.wilkinson2@nhs.net)  
17

18  
19 Tel: 07843209392 01480 234936  
20

21 **Co-Authors:**  
22

23  
24 Rory Braggins University of Cambridge Department of Public Health and Primary Care,  
25 School of Clinical Medicine, Cambridge, Cambridgeshire, UK  
26  
27

28  
29 Ingeborg Steinbach, Centre for Sustainable Healthcare, Oxford, Oxfordshire, UK  
30  
31

32 James Smith, University of Cambridge Department of Public Health and Primary Care  
33 Cambridge, Cambridgeshire, UK  
34  
35

36  
37 **Keywords:** Asthma, Chronic Airways Disease, Respiratory Medicine, Health Economics  
38  
39

40 **Word count** (excluding title page, abstract, references, figures and tables): 3491  
41  
42  
43  
44  
45  
46  
47  
48  
49  
50  
51  
52  
53  
54  
55  
56  
57  
58  
59  
60

## Abstract

**Objectives:** Metered dose inhalers (MDIs) contain propellants which are potent greenhouse gases. Many agencies propose a switch to alternative, low global warming potential (GWP) inhalers, such as dry powder inhalers (DPIs). We aimed to analyse the impact on greenhouse gas emissions and drug costs of making this switch.

**Setting:** We studied NHS prescription data from England in 2017 and collated carbon footprint data on inhalers commonly used in England.

**Results:** If MDIs using HFA propellant are replaced with the cheapest equivalent DPI, then for every 10% of MDIs changed to DPIs, drug costs decrease by £8.2M annually. However if the brands of DPIs stay the same as 2017 prescribing patterns, for every 10% of MDIs changed to DPIs, drug costs increase by £12.7M annually. Most potential savings are due to less expensive LABA/ICS inhalers. Some reliever inhalers (e.g. Ventolin™) have a carbon footprint over 25kgCO<sub>2</sub>e per inhaler, whilst others use far less HFA134a (e.g. Salamol™) with a carbon footprint of less than 10kgCO<sub>2</sub>e per inhaler. HFA227ea LABA/ICS inhalers (e.g. Flutiform™) have a carbon footprint over 36kgCO<sub>2</sub>e, compared to an equivalent HFA134a combination inhaler (e.g. Fostair™) at less than 20kgCO<sub>2</sub>e. For every 10% of MDIs changed to DPIs, 58ktCO<sub>2</sub>e could be saved annually in England.

**Conclusions:** Switching to DPIs would result in large carbon savings and can be achieved alongside reduced drug costs by using less expensive brands. Substantial carbon savings can be made by using small volume HFA134a MDIs, in preference to large volume HFA134a MDIs, or those containing HFA227ea as a propellant.

### Strengths and limitations of this study

- This article draws together a variety of sources of information to demonstrate significant differences in the global warming potential (GWP) of different inhalers.
- The NHS digital database provided a large, reliable dataset for us to analyse cost and greenhouse gas release in various scenarios.
- We calculated cost and greenhouse gas emissions for various scenarios in which inhalers are changed, and for different classes of inhalers (e.g. inhaled steroids, beta-agonists).
- We were unable to analyse national prescription data by diagnosis and do not know which of the inhalers might have been used for asthma, COPD or other diagnoses.
- Detailed information about the carbon footprint of all inhalers is not publicly available.

## Introduction

Metered-dose inhalers contain propellants, which are liquefied, compressed gases used as a driving force and an energy source for atomisation of the drug. Chlorofluorocarbons (CFCs), which were used originally, are both potent greenhouse gases (GHGs) and ozone-depleting substances, and were banned under the Montreal Protocol. They have been replaced by two hydrofluoroalkane (HFA) propellants; 1,1,1,2-tetrafluoroethane (HFA134a) and 1,1,1,2,3,3,3-heptafluoropropane (HFA227ea).<sup>1</sup> Currently MDIs contribute an estimated 3.9% of the carbon footprint of the National Health Service in the UK, because HFAs are potent GHGs.<sup>2</sup> The UK has a high proportion of MDI use (70%) compared to less than 50% in the rest of Europe, and only about 10% in Scandinavia.<sup>3</sup> The most commonly used MDIs in the UK contain salbutamol reliever, though there is pressure to reduce excessive reliever use, which has been linked with poor outcomes in asthma, in favour of controller therapies.<sup>4</sup>

Combating climate change has been described as “the greatest public health opportunity of the 21<sup>st</sup> century”.<sup>5</sup> HFAs are used mainly as refrigerants and are controlled under national F-gas regulations, and the Kigali Amendment to the Montreal Protocol. As F-gas use is phased out, HFA MDIs will become a significant proportion of overall HFA use, especially in the UK, because of the high level of use of MDIs.

There have been calls to switch away from HFA MDIs because of their environmental impact.<sup>6</sup> Effective HFA-free alternatives are already available, as DPIs and aqueous mist inhalers. Switching to inhalers with lower global warming potential (GWP) is a key part of the NHS Sustainable Development Unit’s strategy.<sup>7</sup> In 2017 the British Thoracic Society recommended that prescribers and patients “consider switching pMDIs to non-propellant devices whenever they are likely to be equally effective”.<sup>8</sup> In May 2018 the UK’s Environmental Audit Committee recommended the NHS set a target of reducing to 50% low-GWP inhalers by 2022.<sup>9</sup> In January 2019 the NHS long term plan proposed a 50% reduction in the greenhouse gas emissions from inhalers in 10 years,<sup>10</sup> and established an expert working group to evaluate potential strategies to achieve this.<sup>11</sup> There is patchy information about the carbon footprint of inhalers. Life-cycle analysis of salbutamol MDIs has shown that 95-98% of its carbon footprint derives from the use-phase, when the propellant is released and this dwarfs manufacturing processes.<sup>12,13,14</sup> This article collates and analyses information on type and volume of emitted propellant.

A significant barrier to switching away from MDIs might be the higher “up-front” price of some DPIs; however, the price of MDIs doesn’t take into account the long-term financial cost of their environmental impact. We investigate a variety of scenarios for altered inhaler prescription patterns in England, and the cost implications of switching to MDIs.

## Methods

### Financial analysis

1  
2  
3 We used 2017 prescription data from NHS digital website, including the number of inhalers prescribed and  
4 net ingredient cost.<sup>15</sup> We separated inhalers into different categories; short-acting beta agonists (SABAs),  
5 inhaled corticosteroids (ICS), long-acting beta agonists (LABAs), short-acting muscarinic antagonists  
6 (SAMAs), long-acting muscarinic antagonists (LAMAs) and combination devices. Within these categories  
7 we identified high GWP inhalers which contain HFA propellant, and low GWP inhalers which were DPIs  
8 and Respimat™ devices. The least expensive low-GWP inhaler in each inhaler category was identified,  
9 and the cost and carbon impact of changing inhalers determined in various scenarios. Some discontinued  
10 inhalers and those prescribed in very low numbers (less than 500 a year) were excluded from the analysis.  
11  
12  
13  
14  
15

16 In Model 1, we replaced MDIs with DPIs in the same proportions that brands of DPIs had been prescribed  
17 in England 2017, which we called “proportional replacement”. For example if three DPI inhalers (A, B and  
18 C) made up 50%, 30% and 20% of the DPIs in that category, then proportional replacement would switch  
19 50% of the MDIs to DPI inhaler A, 30% to B and 20% to C. The number of MDIs declines and DPIs  
20 increase, whilst the proportions of each DPI used stays the same.  
21  
22  
23

24 In Model 2, we replaced MDIs with the cheapest available equivalent DPI. We modelled several  
25 alternative scenarios described below and in table 1.  
26  
27

28 *Short-acting beta agonists (SABA; salbutamol).* In 2017 the least expensive MDI salbutamol was £1.88  
29 versus the least expensive DPI salbutamol Salbulin Novolizer™ at £3.36 for 200-dose inhaler. However  
30 the Salbulin Novolizer™ is rarely used in the UK, with only 1,015 prescriptions in 2017, so we modelled  
31 an alternative scenario in which we changed MDIs to Salbutamol Easyhaler™ instead (£3.85 per inhaler).  
32  
33  
34

35 *Long-acting beta agonists (LABA).* The least expensive LABA in 2017 was Formoterol Easyhaler™, which  
36 is similarly priced to the least expensive MDI LABA at £25.37 per inhaler.  
37  
38  
39

40 *Inhaled corticosteroids (ICS).* We divided ICS inhalers as described in BTS/SIGN guidance into very low,  
41 low, medium and high strength inhalers.<sup>4</sup> We identified the least expensive equivalent DPI ICS in each  
42 category. These were Flixotide 50 Accuhaler™ (£8.54 per inhaler) one inhalation BD for very low strength,  
43 Beclometasone 200 Easyhaler™ (£16.85 per inhaler) one inhalation BD for low strength and two  
44 inhalations bd for medium strength, Budesonide 400 Easyhaler™ (£20.39 per inhaler) two inhalations BD  
45 for high strength.  
46  
47  
48  
49

50 *LABA/ICS combination inhalers.* We divided inhalers into low, medium and high strength inhaled  
51 corticosteroids. The least expensive DPI inhalers were Seretide 100 Accuhaler™ (£23.89 per inhaler),  
52 Relvar 92/22 Ellipta™ (£25.31 per inhaler) and Fostair 200/6 Nexthaler™ (£33.28 per inhaler) respectively.  
53 Relvar™ is a once-daily inhaler which would result in a change in dosing regimen for many patients, and it  
54 is also not licensed for maintenance and reliever therapy in asthma patients. We therefore modelled an  
55 alternative scenario whereby we switched medium strength LABA/ICS combination inhalers to Fostair  
56 100/6 Nexthaler™ (£33.42 per inhaler).  
57  
58  
59  
60

1  
2  
3 *Short and long-acting muscarinic antagonists and LAMA/LABA combination inhalers.* We did not change  
4 these inhalers in our model as all SAMAs are MDI and all LAMAs and LAMA+LABA devices are DPI or  
5 aqueous mist inhalers. There are potential clinical and environmental benefits from switching SAMA to  
6 LAMA inhalers.<sup>16</sup>  
7  
8

9  
10 *LABA/LAMA/ICS inhalers.* Two of these “triple” inhalers became available for the first time in 2017, one  
11 MDI (Trimbow™ at £47.42) and one DPI (Trelegy™ at £58.10 per inhaler).  
12  
13

### 14 **Greenhouse gas analysis**

15  
16 Information on the amount of HFA propellant in MDIs is not publically available, so alternative sources of  
17 information were sought. Studies have estimated the contents of MDIs by weighing empty and full  
18 inhalers, and patents also provide some data. The carbon footprint was estimated by multiplying the  
19 estimated weight of HFA propellant by its GWP. GWP is a measure of how much heat a greenhouse gas  
20 traps in the atmosphere over a specific time, relative to carbon dioxide. For the purposes of this article, we  
21 used GWP values of HFAs for a 100-year time horizon as reported in the IPCC Fifth Assessment Report.<sup>17</sup>  
22  
23  
24

25  
26 We identified the 20 most commonly prescribed MDIs using NHS prescribing data.<sup>18</sup> We searched google  
27 patents search engine (<https://patents.google.com/>) using the search terms “inhaler name” or “drug name”  
28 AND HFA or HFA134a or HFA227ea. Links and citations from relevant results were followed. We also  
29 reviewed data from the Montreal Protocol Medical Technical Options Committee.<sup>19</sup>  
30  
31  
32

33  
34 The carbon footprint of commonly prescribed inhalers is summarised in table 2. All Salbutamol MDIs use  
35 HFA134a, with a GWP of 1,300. There are two types of salbutamol MDIs, one a small volume MDI  
36 containing alcohol as a co-solvent, which requires less HFA propellant than the large volume alcohol-free  
37 type.<sup>20</sup> A study comparing a large volume inhaler Ventolin Evohaler™ with small volume Salamol™  
38 inhaler found the weight of the contents (mainly HFA134a propellant) to be 17.32 and 7.88g respectively.  
39 A GSK patent for salbutamol MDI shows inhalers containing 18.2g and 19.8g of HFA134a.<sup>21,22</sup> GSK  
40 published a Carbon Trust certified carbon footprint analysis which estimated Ventolin™ to have a carbon  
41 footprint of 28kgCO<sub>2</sub>e/inhaler, far greater than a small volume inhaler (Proventil™) at around  
42 10kgCO<sub>2</sub>e/inhaler.<sup>23,12</sup>  
43  
44  
45  
46

47  
48 For SAMAs we used manufacturer’s product carbon footprint data on Atrovent™ which has a product  
49 carbon footprint of 14.59kg.<sup>14</sup>  
50

51  
52 For ICS, comparison of two patents for beclometasone inhalers, suggest that those with alcohol use around  
53 half the HFA134a propellant (12.3g with alcohol versus 20g of HFA134a alone) of HFA134a.<sup>24,25</sup>  
54

55  
56 For LABA/ICS combination inhalers, one patent for Fluticasone/Salmeterol MDI (Seretide™) contained  
57 18.2g of HFA134a.<sup>21</sup> GSK published carbon footprint estimates 19kgCO<sub>2</sub>e/inhaler for their LABA,  
58 ICS/LABA and LABA MDIs. However, an FDA report on the US Advair™ brand of  
59 Fluticasone/Salmeterol MDI stated the inhaler has a net weight of just 12g/inhaler.<sup>26</sup>  
60



Two LABA/ICS MDIs (Symbicort™ MDI and Flutiform™) use HFA227ea as a propellant, which has higher GWP of 3,320. A patent for Flutiform™ indicates it contains 11g (+/-0.5g) of HFA227ea, resulting in the largest carbon footprint of any inhaler at 36.5kgCO<sub>2</sub>e/inhaler.<sup>27</sup>

Currently both LAMA alone, and LAMA/LABA combinations are exclusively available in the UK as DPIs. There is only one triple ICS/LAMA/LABA combination available in an MDI, and no data on propellant volume could be found (Trimbow™).

### DPIs and aqueous mist inhalers

DPIs and aqueous mist inhalers (such as Respimat™) do not contain HFAs. The Medical Technical Options Committee of the United Nations estimated the carbon footprint of a DPI to be between 1.5kg and 6kg CO<sub>2</sub>e for a 200-dose inhaler (7.5g-30g/dose) but most DPIs contain far fewer than 200 doses.<sup>19</sup> GSK's Carbon Trust-verified analysis of their DPIs (containing one months' treatment) found a carbon footprint of slightly less than one kilogram CO<sub>2</sub>e/inhaler.<sup>23</sup> Product carbon footprint analysis of Spiriva Respimat™ published by the manufacturers found it to have a carbon footprint of 780gCO<sub>2</sub>e, but potentially lower if refill cartridges are used.<sup>14</sup> For our analyses we assumed a carbon footprint of 1kg CO<sub>2</sub>e per DPI, and used the mid-point of the range of carbon footprints for each class of MDI.

### Patient and Public Involvement

A prior survey conducted in Hertfordshire, UK by one of the authors (AW) found that eighty six percent of patients agreed that both cost and carbon footprint are important factors to consider when changing inhalers, although ease of use was considered the most important factor overall.<sup>28</sup>

## Results

### Financial implications

By analysing NHS prescription data, we modelled how prescription costs would change in various different prescription scenarios. In Model 1, we replaced MDIs with DPIs in the same proportions that brands of DPIs had been prescribed in England 2017, which we called "proportional replacement". In this scenario for every 10% of MDIs changed the total cost *increased* by £12.7M annually. In Model 2, we replaced MDIs with the cheapest available equivalent DPI. In this scenario for every 10% of MDIs changed total cost *decreased* by £8.2M annually, but we saw different price changes for different types of inhalers..

*Short-acting beta agonists (SABA; salbutamol).* When Salbutamol MDIs were replaced with Salbulin Novolizer™ costs rose £2.02M for every 10% of MDIs changed. As Salbulin Novolizer™ is rarely used in the UK, we modelled an alternative scenario in which we changed MDIs to Salbutamol Easyhaler™ whereby costs rose £3.01M for every 10% of inhalers changed.

1  
2  
3 *Long-acting beta agonists (LABA)*. When switching to Formoterol Easyhaler™ savings of £1.02M were  
4 made for every 10% of MDIs changed. For proportional replacement, costs increased by £1.47M for every  
5 10% of MDIs changed.  
6  
7

8 *Inhaled corticosteroids (ICS)*. We found costs increased slightly; £207K for every 10% of MDIs switched  
9 to the cheapest DPI. For proportional replacement costs rose £8.25M for every 10% of MDIs changed.  
10  
11

12 *LABA/ICS combination inhalers*. We saw large cost savings; £10.0M saved for every 10% of MDIs  
13 switched to the least expensive DPI LABA/ICS. When switching to Fostair 100/6 Nexthaler™ instead of  
14 Relvar 92/22 Ellipta™, as Fostair also has a license for maintenance and reliever therapy, we saw more  
15 modest cost savings of £6.25M for every 10% of MDIs switched. For “proportional” replacement costs fell  
16 £668K for every 10% of MDIs changed.  
17  
18  
19

20 *LABA/ LAMA/ICS inhalers*. In 2017 only 5,211 of these inhalers were prescribed and the cost of switching  
21 from MDI to DPI was £555K for every 10% of inhalers switched.  
22  
23

## 24 **Carbon footprint**

25  
26 We found some reliever inhalers (e.g. Ventolin™) to have a carbon footprint over 25kgCO<sub>2</sub>e per inhaler,  
27 whilst others use far less HFA134a (e.g. Salamol™) with a carbon footprint of less than 10kgCO<sub>2</sub>e per  
28 inhaler. HFA227ea LABA/ICS inhalers (e.g. Flutiform™) have a carbon footprint over 36kgCO<sub>2</sub>e,  
29 compared to an equivalent HFA134a combination inhaler (e.g. Fostair™) at less than 20kgCO<sub>2</sub>e. We  
30 estimated the total carbon footprint of MDIs prescribed in the community in England in 2017 to be 635kt  
31 CO<sub>2</sub>e. For every 10% of HFA MDIs changed to low-GWP devices 58ktCO<sub>2</sub>e could be saved annually.  
32 Reaching the EAC target of 50% of inhalers being low-GWP devices by 2022, would save 288ktCO<sub>2</sub>e  
33 every year. Reducing the proportion of high-GWP devices to 10%, as seen in Sweden, would result in  
34 carbon savings 519ktCO<sub>2</sub>e every year.  
35  
36  
37  
38  
39  
40  
41

## 42 **Discussion**

43  
44 If prescribers switch from high GWP to the least expensive low GWP options within each therapeutic  
45 category, major financial savings could be made alongside large carbon reductions. Most of the savings are  
46 seen by switching from more expensive LABA/ICS MDIs to less expensive DPIs. These potential savings  
47 would exceed the cost of switching the larger volume of Salbutamol MDIs to DPIs, because the  
48 incremental cost per salbutamol inhaler (less than £2/inhaler) is much lower.  
49  
50  
51

52 A second option in which prescribers switch from MDI to the DPIs according to the current proportions of  
53 brand prescribing, would be more expensive. Neither clinicians nor formularies would likely support a  
54 switch to equivalent inhalers which were more expensive. A third option in which prescribers switch from  
55 an MDI to DPI for the same branded LABA/ICS combination (e.g. Seretide™ or Fostair™) is generally  
56 either cost neutral or less expensive.  
57  
58  
59  
60

1  
2  
3 There is recent focus on cost-effectiveness, which takes into account ease of use, dose frequency and other  
4 “softer” factors that would encourage adherence, impact clinical outcomes and in turn economic cost in the  
5 real world. Poor inhaler technique is very common and greatly limits the effectiveness of inhaled  
6 medications. The most recent large meta-analysis identified fewer errors overall with DPIs, even when  
7 MDI users had spacers.<sup>29</sup> The Salford lung study was a large, pragmatic randomised trial that showed  
8 improved clinical outcomes in asthma and COPD patients assigned to once daily Relvar™ DPI instead of  
9 their usual inhaler (which was an MDI in 68%).<sup>30,31</sup> One historical matched cohort study found better  
10 asthma control in patients initiated on an MDI compared to DPI, but this study only compared Seretide  
11 Evohaler and Accuhaler.<sup>32</sup> A similar matched cohort study demonstrated asthma patients can be switched  
12 from other ICS inhalers to the Easyhaler™ with no reduction in clinical effectiveness or change in cost.<sup>33</sup>  
13 Another similar study found better asthma control and fewer exacerbations in patients starting or  
14 increasing strength of DPIs or breath-actuated inhalers compared to pMDIs.<sup>34</sup> A further benefit of DPIs is  
15 that they use a dose counter, whereas Salbutamol and ICS MDIs generally do not. Patients often cannot  
16 determine when their MDIs are empty and either throw away half full inhalers, or conversely continue to  
17 use empty inhalers unknowingly.<sup>35</sup>

18  
19  
20  
21  
22  
23  
24  
25  
26 Our cost analysis has a number of limitations. Our data only includes community prescriptions in England;  
27 hospital prescriptions are not included. However, patients receiving prescriptions from hospital are likely  
28 to have more severe disease requiring combination inhalers, so the potential cost savings could be even  
29 greater. Our models do not include the impact of future changes in prescribing practice such as the recent  
30 introduction of triple LAMA/LABA/ICS inhalers. In reality costs are in flux and subject to market  
31 pressures, but our analysis allows comparison between treatments at a specific time point.

32  
33  
34  
35  
36  
37 The MDIs assessed were found to have a wide range of carbon footprints; 10-37 times that of a DPI. The  
38 UK government reports incorrectly assumes that all inhalers contain 12g of propellant.<sup>36</sup> Even among  
39 MDIs, those containing HFA227ea propellant or large volume HFA134a propellant have twice the carbon  
40 footprint or more compared to small volume MDIs. Around 6.5 million large volume MDIs for salbutamol  
41 were prescribed in England in 2016, and switching these to small volume MDIs could save 159ktCO<sub>2</sub>e in  
42 England alone, with little clinical or patient impact.<sup>37</sup> Our findings provide a potentially more accurate  
43 model that could be transferred to other countries wanting to monitor and regulate MDIs in relation to  
44 carbon footprint.

45  
46  
47  
48  
49  
50 Inhaler recycling has the potential to reduce the environmental impact of inhalers through recovery of  
51 propellant, although so far, uptake has been very low with less than 1% of MDIs recovered and of little  
52 measurable impact in climate terms.<sup>13</sup> Where recycling is not available, incinerating MDIs with medicines  
53 waste is an effective strategy; this causes thermal degradation of the HFA into chemicals with far smaller  
54 global warming potential.<sup>38</sup> A study of inhalers returned for recycling jointly funded by GSK and NHS  
55 Grampian showed that 48% of doses remain in MDIs, compared to just 27% in DPIs.<sup>39</sup> This means that a  
56 significant proportion of the propellant could be captured, and that the carbon footprint of MDIs roughly  
57  
58  
59  
60

1  
2  
3 halved if they were all recycled. This also highlights the importance of explaining to patients the number  
4 of doses their inhaler contains as part of inhaler technique training. Strategies to reduce greenhouse gas  
5 emissions from MDIs are summarised in table 3.  
6  
7

8  
9 An important question is whether to switch to DPIs now, or wait for reformulated MDIs with novel low  
10 GWP propellants. Three low GWP propellants have been considered, isobutane, HFA152a and HFO  
11 1234ea. An isobutane programme has been underway for a decade in Argentina, but not yet been  
12 commercialised. HFA152a has a lower carbon footprint (one tenth of HFA134a) and HFO1234ea zero,  
13 but both remain at early stage development.<sup>1</sup> Very large clinical trials will be required to establish their  
14 safety, alone and then in combination with every moiety that uses them. Transition to a novel propellant(s)  
15 would likely take at least a decade based on experience from the transition from CFCs,<sup>40</sup> although this may  
16 be cost-effective from a worldwide perspective, especially in developing countries.  
17  
18  
19  
20  
21

22 Several papers assert that some patients are unable to generate the inspiratory flows necessary to activate  
23 DPIs, particularly during exacerbations.<sup>41-42</sup> However, 93% of prescriptions for LAMA or LAMA/LABA  
24 devices for COPD in England are for DPIs, suggesting clinicians believe the vast majority of patients can  
25 use a DPI effectively.<sup>18</sup> In contrast, 94% of SABA prescriptions are for MDIs leading to a confusing  
26 mixture of inhalation techniques.<sup>18</sup> COPD patients whose inhaler devices use the same inhalation  
27 technique show better clinical outcomes than those prescribed devices requiring different techniques.<sup>43</sup> One  
28 small study examined patients' ability to use MDIs and DPIs effectively during the course of an  
29 exacerbation and found best results from an Accuhaler™ DPI which has medium resistance but is effective  
30 at relatively low peak inspiratory flow rates of 30L/min.<sup>44</sup> Switching to DPI SABAs could potentially lead  
31 to a simplification of inhalation technique, an improvement in care and a reduction in carbon footprint. A  
32 recent proposal suggests a reliever MDI + spacer could be kept separately in an emergency pack in case of  
33 exacerbations.<sup>45</sup> Whatever inhalers are used, adequate patient training and assessment of inhaler technique  
34 will be essential for efficient and effective inhaler use.<sup>29</sup>  
35  
36  
37  
38  
39  
40  
41  
42

43 Patients care about the carbon footprint of their inhalers. One survey of inhaler users found that 78% rated  
44 carbon footprint as important; equally important to them as financial cost.<sup>28</sup> Changing one MDI device to a  
45 DPI could save 150kg to 400kg CO<sub>2</sub>e annually; roughly equivalent to installing wall insulation at home,  
46 recycling, or cutting out meat.<sup>46</sup> These are individual actions that many environmentally concerned  
47 individuals are keen to take.  
48  
49

50  
51 Our carbon footprint results for England are consistent with other studies of MDIs in the UK (which  
52 included Scotland, Wales and Northern Ireland), which show that they contribute approximately a megaton  
53 of CO<sub>2</sub>e to global greenhouse gas emissions. Climate change is estimated to kill 250,000 people annually  
54 by 2030, particularly vulnerable people in financially poor countries.<sup>47</sup> Physicians should not shy away  
55 from these issues, and tools, such as NICE's recent patient decision aid for asthma inhalers are to be  
56 welcomed.<sup>48</sup>  
57  
58  
59  
60

## Conclusions

Climate change is a huge and present threat to health which will disproportionately impact the poorest and most vulnerable on the planet, including people with pre-existing lung disease. Every effort must be made to minimise greenhouse gas release to protect current and future generations from the worst effects of climate change.

Switching to low GWP inhalers can be achieved whilst making financial savings in terms of drug costs. Patients, prescribers and guideline authors should carefully consider the carbon footprint of these inhalers and where they are likely to be equally effective, prioritise low GWP inhalers.

Where MDIs are considered necessary, other steps can be taken immediately to reduce their environmental impact. Smaller volume HFA134a inhalers should be prioritised over larger volume or HFA227ea-containing inhalers, manufacturers should consider phasing out the use of HFA227ea, and patients, manufacturers and clinicians should publicise and encourage inhaler recycling.

## References

- 1 Myrdal PB, Sheth P, Stein SW. Advances in Metered Dose Inhaler Technology: Formulation Development. *AAPS PharmSciTech* 2014; **15**: 434–55.
- 2 NHS Sustainable Development Unit. Reducing the use of natural resources in health and social care. 2018 Report. 2018; : 1–31.
- 3 Lavorini F, Corrigan CJ, Barnes PJ, *et al*. Retail sales of inhalation devices in European countries: So much for a global policy. *Respir Med* 2016; **105**: 1099–103.
- 4 BTS/SIGN British Guideline for the management of asthma, 2016, SIGN 153. <http://www.sign.ac.uk/sign-153-british-guideline-on-the-management-of-asthma.html>.
- 5 Wang H, Horton R. Tackling climate change: the greatest opportunity for global health. *Lancet* 2015. DOI:10.1016/S0140-6736(15)60931-X.
- 6 Hillman T, Mortimer F, Hopkinson NS. Inhaled drugs and global warming: time to shift to dry powder inhalers. *BMJ* 2013; **346**. <http://www.bmj.com/content/346/bmj.f3359.abstract>.
- 7 NHS Sustainable Development Unit. Sustainable Development in the Health and Care System: Health Check 2016. 2016; : 16.
- 8 British Thoracic Society. THE ENVIRONMENT AND LUNG HEALTH POSITION STATEMENT • January 2017. 2017. <https://www.brit-thoracic.org.uk/document-library/audit-and-quality-improvement/environment-and-lung-health/the-environment-and-lung-health/>.
- 9 Creagh M, Labour MP, Clark C, Conservative MP. Environmental Audit Committee UK Progress on reducing F-gas Emissions. 2018.
- 10 The NHS Long Term Plan. London, 2019 [www.longtermplan.nhs.uk](http://www.longtermplan.nhs.uk).
- 11 Centre for Sustainable Healthcare. Expert Working Group on reducing the climate change impact of inhalers. 2018. <https://networks.sustainablehealthcare.org.uk/networks/sustainable-respiratory-care/expert-working-group-reducing-climate-change-impact-inhalers> (accessed June 24, 2019).
- 12 Goulet B, Olson L, Mayer B. A Comparative Life Cycle Assessment between a Metered Dose Inhaler and Electric Nebulizer. *Sustainability* 2017; **9**: 1725.
- 13 GSK. Complete the cycle – how we’re recycling inhalers. 2018. <https://www.gsk.com/en-gb/behind-the-science/how-we-do-business/complete-the-cycle-how-we-re-recycling-inhalers/> (accessed July 18, 2018).
- 14 Hänsel M, Bambach T, Wachtel H. Reduced environmental impact of a reusable soft mist inhaler. *Eur Respir J* 2018; **52**: PA1021.
- 15 NHS England. NHS digital. 2017. <https://digital.nhs.uk/prescribing> (accessed July 17, 2018).

- 1  
2  
3 16 Cheyne L, Irvin-Sellers MJ, White J. Tiotropium versus ipratropium bromide for chronic obstructive  
4 pulmonary disease. *Cochrane Database Syst Rev* 2015. DOI:10.1002/14651858.CD009552.pub3.  
5  
6  
7 17 Global Warming Potential Values. 2014. [https://www.ghgprotocol.org/sites/default/files/ghgp/Global-](https://www.ghgprotocol.org/sites/default/files/ghgp/Global-Warming-Potential-Values%28Feb%2016%202016%29_1.pdf)  
8 [Warming-Potential-Values %28Feb 16 2016%29\\_1.pdf](https://www.ghgprotocol.org/sites/default/files/ghgp/Global-Warming-Potential-Values%28Feb%2016%202016%29_1.pdf) (accessed Jan 17, 2019).  
9  
10  
11 18 NHS Business Services Authority. [https://www.nhsbsa.nhs.uk/sites/default/files/2017-10/PCA Aug](https://www.nhsbsa.nhs.uk/sites/default/files/2017-10/PCA%20Aug%2017.xlsx)  
12 [17.xlsx](https://www.nhsbsa.nhs.uk/sites/default/files/2017-10/PCA%20Aug%2017.xlsx) %0A (accessed Aug 21, 2018).  
13  
14 19 Montreal Protocol On Substances that Deplete the Ozone Layer Report of the UNEP Medical Technical  
15 Options Committee 2014 Assessment. Nairobi, Kenya, 2014.  
16  
17  
18 20 Sellers WFS. Asthma pressurised metered dose inhaler performance: propellant effect studies in  
19 delivery systems. *Allergy Asthma Clin Immunol* 2017; **13**: 30.  
20  
21 21 Akehurst RA, Taylor AJ, Wyatt DA. Aerosol formulations containing propellant 134a and fluticasone  
22 propionate. 1997; published online Aug 19. <https://www.google.com/patents/US5658549>.  
23  
24  
25 22 Ian I, Ashurst C, Herman CS, Li-bovet L, Riebe MT. United States Patent ( 19 ). 2000.  
26  
27 23 Atherton M. ENVIRONMENTAL IMPACT OF INHALERS. 2017. [https://www.greatermanchester-](https://www.greatermanchester-ca.gov.uk/download/meetings/id/2423/environmental_impact_of_inhalers)  
28 [ca.gov.uk/download/meetings/id/2423/environmental\\_impact\\_of\\_inhalers](https://www.greatermanchester-ca.gov.uk/download/meetings/id/2423/environmental_impact_of_inhalers) (accessed Aug 27, 2018).  
29  
30  
31 24 Brambilla G, Johnson R, Lewis DA. Aerosol inhalation device. 2014; published online March 6.  
32 <https://www.google.com/patents/WO2014033057A1?cl=en>.  
33  
34  
35 25 Brown M, Jones S, Martin G. Metered dose inhalation preparations of therapeutic drugs. 2010.  
36 [https://patents.google.com/patent/WO2005055985A1/en?q=qvar+AND+HFA134&oq=qvar+AND+HF](https://patents.google.com/patent/WO2005055985A1/en?q=qvar+AND+HFA134&oq=qvar+AND+HFA134)  
37 [A134](https://patents.google.com/patent/WO2005055985A1/en?q=qvar+AND+HFA134&oq=qvar+AND+HFA134) (accessed Aug 17, 2018).  
38  
39  
40 26 (DMETS) D of ME and TS. CENTER FOR DRUG EVALUATION AND RESEARCH  
41 APPLICATION NUMBER: NDA 21-254. 2006  
42 [https://www.accessdata.fda.gov/drugsatfda\\_docs/nda/2006/021254s000\\_NameR.pdf](https://www.accessdata.fda.gov/drugsatfda_docs/nda/2006/021254s000_NameR.pdf).  
43  
44  
45 27 Mueller-Walz R, Fueg LM. Medicinal aerosol formulations. 2014; published online Oct 23.  
46 <https://www.google.com/patents/US20140314684>.  
47  
48  
49 28 Liew KL, Wilkinson A. P280 How do we choose inhalers? patient and physician perspectives on  
50 environmental, financial and ease-of-use factors. *Thorax* 2017; **72**: A235 LP-A237.  
51  
52  
53 29 Sanchis J, Gich I, Pedersen S. Systematic review of errors in inhaler use: Has patient technique  
54 improved over time? *Chest* 2016; **150**: 394–406.  
55  
56  
57 30 Woodcock A, Vestbo J, Bakerly ND, *et al*. Effectiveness of fluticasone furoate plus vilanterol on asthma  
58 control in clinical practice: an open-label, parallel group, randomised controlled trial. *Lancet* 2017; **390**:  
59 2247–55.  
60

- 1  
2  
3 31 Vestbo J, Leather D, Diar Bakerly N, *et al.* Effectiveness of Fluticasone Furoate–Vilanterol for COPD  
4 in Clinical Practice. *N Engl J Med* 2016; **375**: 1253–60.  
5  
6  
7 32 Price D, Roche N, Christian Virchow J, *et al.* Device type and real-world effectiveness of asthma  
8 combination therapy: An observational study. *Respir Med* 2011; **105**: 1457–66.  
9  
10 33 Price DB, Rigazio A, Small MB, Ferro TJ. Historical cohort study examining comparative effectiveness  
11 of albuterol inhalers with and without integrated dose counter for patients with asthma or chronic  
12 obstructive pulmonary disease. *J Asthma Allergy* 2016; **Volume 9**: 145–54.  
13  
14  
15 34 Price D, Haughney J, Sims E, *et al.* Effectiveness of inhaler types for real-world asthma management:  
16 retrospective observational study using the GPRD. *J Asthma Allergy* 2011; **4**: 37–47.  
17  
18  
19 35 Conner JB, Buck PO. Improving Asthma Management: The Case for Mandatory Inclusion of Dose  
20 Counters on All Rescue Bronchodilators. *J Asthma* 2013; **50**: 658–63.  
21  
22  
23 36 Webb N, Broomfield M, Brown P, *et al.* UK greenhouse gas inventory, 1990 to 2012: annual report for  
24 submission under the Framework Convention on Climate Change. 2014  
25 [https://assets.publishing.service.gov.uk/government/uploads/system/uploads/attachment\\_data/file/57317](https://assets.publishing.service.gov.uk/government/uploads/system/uploads/attachment_data/file/573172/UKnationalinventoryreport1990-2014.pdf)  
26 [2/UKnationalinventoryreport1990-2014.pdf](https://assets.publishing.service.gov.uk/government/uploads/system/uploads/attachment_data/file/573172/UKnationalinventoryreport1990-2014.pdf)0Ahttp://nora.nerc.ac.uk/508171/.  
27  
28  
29 37 Williamson IJ, Reid A, Monie RD, Fennerty AG, Rimmer EM. Generic inhaled salbutamol versus  
30 branded salbutamol. A randomised double-blind study. *Postgrad Med J* 1997; **73**: 156–8.  
31  
32  
33 38 Waste and Resources Action Programme. Inhalers | Recycle Now. [https://www.recyclenow.com/what-](https://www.recyclenow.com/what-to-do-with/inhalers-0)  
34 [to-do-with/inhalers-0](https://www.recyclenow.com/what-to-do-with/inhalers-0) (accessed May 20, 2019).  
35  
36  
37 39 NHS Grampian audit. [www.dontwasteabreath.com/view/facts](http://www.dontwasteabreath.com/view/facts) (accessed March 5, 2018).  
38  
39  
40 40 Woodcock A. The president speaks: prevention is best: lessons from protecting the ozone layer. *Thorax*  
41 2012; **67**: 1028–31.  
42  
43 41 Al Showair RA, Tarsin WY, Assi KH, Pearson SB, Chrystyn H. Can all patients with COPD use the  
44 correct inhalation flow with all inhalers and does training help? *Respir Med* 2007; **101**.  
45 DOI:10.1016/j.rmed.2007.06.008.  
46  
47  
48 42 Adachi Y, Adachi YS, Itazawa T, Yamamoto J, Murakami G, Miyawaki T. Measurement of peak  
49 inspiratory flow rates with an in-check meter to identify preschool children’s ability to use dry powder  
50 inhalers; Diskus and Turbuhaler. *J Allergy Clin Immunol* 2018; **113**: S114.  
51  
52  
53 43 Bosnic-Anticevich S, Chrystyn H, Costello RW, *et al.* The use of multiple respiratory inhalers requiring  
54 different inhalation techniques has an adverse effect on COPD outcomes. *Int J Chron Obstruct Pulmon*  
55 *Dis* 2017; **12**: 59–71.  
56  
57  
58 44 Broeders MEAC, Molema J, Hop WCJ, Vermue NA, Folgering HTM. The course of inhalation profiles  
59 during an exacerbation of obstructive lung disease. *Respir Med* 2004; **98**: 1173–9.  
60



- 1  
2  
3 45 Keeley D, Partridge MR. Emergency MDI and spacer packs for asthma and COPD. *Lancet Respir Med*  
4 2019; **7**: 380–2.  
5  
6  
7 46 Wynes S, Nicholas KA. The climate mitigation gap: education and government recommendations miss  
8 the most effective individual actions. *Environ* 2017; **12**: 1–9.  
9  
10 47 Climate change and health. World Heal. Organ. 2018. [http://www.who.int/en/news-room/fact-](http://www.who.int/en/news-room/fact-sheets/detail/climate-change-and-health)  
11 [sheets/detail/climate-change-and-health](http://www.who.int/en/news-room/fact-sheets/detail/climate-change-and-health).  
12  
13  
14 48 Excellence NI for H and C. Patient decision aid. Inhalers for asthma. London, 2019.  
15  
16 49 Thompson J. A process for the production and screening of materials for use in pharmaceutical aerosol  
17 formulations. 2017. <https://patents.google.com/patent/EP1588698A2/> (accessed Aug 4, 2018).  
18  
19  
20 50 GODFREY APGSK, WARBY RB. Metered dose inhaler for salmeterol xinafoate. 2003; published  
21 online Sept 17. <https://www.google.co.uk/patents/EP1343550A1?cl=en>.  
22  
23  
24  
25  
26  
27  
28  
29  
30  
31  
32  
33  
34  
35  
36  
37  
38  
39  
40  
41  
42  
43  
44  
45  
46  
47  
48  
49  
50  
51  
52  
53  
54  
55  
56  
57  
58  
59  
60

**Table 1 Financial implications of switching from MDIs to DPIs**

| Inhaler type (and most common example)      | Number prescribed in 2017 | Total cost of this type of inhaler (£) | Cheapest DPI alternative                     | Cost change with proportional replacement (per 10%) | Cost change with cheapest replacement (per 10%) |
|---------------------------------------------|---------------------------|----------------------------------------|----------------------------------------------|-----------------------------------------------------|-------------------------------------------------|
| SABA (salbutamol MDI)                       | 21,930,625                | £58,195,683.24                         | Salbutamol100<br>Easyhaler™                  | £3,068,201.99                                       | £2,021,405.23                                   |
| LABA (Salmeterol 25 MDI)                    | 700,145                   | £25,250,958.95                         | Formoterol<br>Easyhaler™                     | £1,474,723.02                                       | -£1,018,957.21                                  |
| Very low dose ICS (Clenil modulite™ 50)     | 221,836                   | £82,931,128.16                         | Flixotide<br>Accuhaler™ 50, 1 inh<br>BD      | £875,534.13                                         | £ 875,534.13                                    |
| Low dose ICS (Clenil modulite™ 100)         | 3,874,077                 | £36,581,577.50                         | Beclometasone<br>Easyhaler™ 200, 1<br>inh BD | £2,461,791.16                                       | -£213,579.26                                    |
| Medium dose ICS (Clenil modulite™ 200)      | 1,683,466                 | £34,611,159.90                         | Beclometasone<br>Easyhaler™ 200, 2<br>inh BD | £3,828,332.15                                       | -£628,752.90                                    |
| High dose ICS (Clenil modulite™ 250)        | 287,604                   | £7,923,785.74                          | Budesonide<br>Easyhaler™ 400, 2<br>inh BD    | £1,084,787.73                                       | £173,464.97                                     |
| Low dose ICS+LABA (Seretide 50 Evohaler™)   | 1,181,941                 | £32,582,876.16                         | Duoresp Spiromax™<br>160/4.5, 1 inh bd       | £749,613.82                                         | £121,485.45                                     |
| Medium dose ICS+LABA (Fostair™ 100/6 MDI)   | 9,467,562                 | £373,045,012.90                        | Relvar Ellipta™ 92/,<br>1 inh OD             | £3,124,173.89                                       | -£4,876,327.15                                  |
|                                             |                           |                                        | OR Fostair 100/6<br>Nexthaler™ 2 inh BD      |                                                     | OR -<br>£1,123,070.10                           |
| High dose ICS+LABA (Seretide 250 Evohaler™) | 244,682                   | £184,212,379.80                        | Fostair 200/6<br>Nexthaler™ 2 inh BD         | -£6,454,411.73                                      | -£5,248,427.76                                  |
| ICS+LAMA+LABA (Trimbow™)                    | 5,211                     | £247,464.50                            | Trelegy Ellipta™                             | £ 552,801.25                                        | £552,801.25                                     |

Table 2 Indicative carbon footprint of commonly prescribed MDIs by inhaler class

| Class of inhaler (and most commonly prescribed inhaler in this class) | Indicative amount of HFA propellant per inhaler (g) | Global warming potential of HFA (over 100 years) <sup>17</sup> | Carbon footprint of inhaler (g CO <sub>2</sub> e) (range and midpoint in brackets) | Actuations per inhaler | Carbon footprint per actuation (g CO <sub>2</sub> e)  | Source                                                                                                           |
|-----------------------------------------------------------------------|-----------------------------------------------------|----------------------------------------------------------------|------------------------------------------------------------------------------------|------------------------|-------------------------------------------------------|------------------------------------------------------------------------------------------------------------------|
| Small volume SABA (e.g. Salamol™)                                     | 6.68-8.5                                            | 1,300                                                          | 8,680-11,050 (9,870)                                                               | 200                    | 43.4-55.3 (48.6 in life cycle analysis <sup>7</sup> ) | Published carbon footprint study. <sup>9</sup> Inhaler performance study <sup>20</sup> patent <sup>49</sup>      |
| Large volume SABA (e.g. Ventolin™)                                    | 17.32-19.8                                          | 1,300                                                          | 22,520-28,000 (25,260)                                                             | 200                    | 112-129                                               | Inhaler performance study <sup>20</sup> , patents <sup>21,22</sup> , independently certified study <sup>23</sup> |
| SAMA (e.g. Atrovent™)                                                 | 11                                                  | 1,300                                                          | 14.3kg (total product carbon footprint 14.59kg)                                    | 200                    | 71.5                                                  | Product carbon footprint published by manufacturer <sup>14</sup>                                                 |
| LABA (e.g. Salmeterol)                                                | 12                                                  | 1,300                                                          | 15,600-19,000 (17,300)                                                             | 120                    | 130                                                   | Patent <sup>50</sup> , independent study <sup>23</sup>                                                           |
| ICS (e.g. Clenil™)                                                    | 11.32-20                                            | 1,300                                                          | 14,700-26,000 (20,350)                                                             | 200                    | 73.5-130                                              | Patents <sup>24,25</sup> , independently certified study <sup>23</sup>                                           |
| HFA134a ICS/LABA (e.g. Fostair™)                                      | 12-18.2                                             | 1,300                                                          | 15,600-23,700 (19,650)                                                             | 120                    | 130-197                                               | FDA report, <sup>26</sup> Patent, <sup>21</sup> independently certified study <sup>23</sup>                      |
| HFA 227ea ICS/LABA (e.g. Flutiform™)                                  | 11                                                  | 3,320                                                          | 36,500                                                                             | 120                    | 295                                                   | Patent <sup>27</sup>                                                                                             |

**Table 3 Strategies to reduce greenhouse gas emissions from MDIs**

| Strategy                                                                                             | Effect                                                                                                                                                                           | Potential CO <sub>2</sub> e saving                                                                                                                         |
|------------------------------------------------------------------------------------------------------|----------------------------------------------------------------------------------------------------------------------------------------------------------------------------------|------------------------------------------------------------------------------------------------------------------------------------------------------------|
| Where appropriate, switch from MDI to non-propellant inhaler                                         | Avoids use of HFA propellants                                                                                                                                                    | 8-36kg per inhaler                                                                                                                                         |
| Change from large volume reliever (e.g. Ventolin Evohaler™) to small volume reliever (e.g. Salamol™) | Small volume reliever contains far less propellant                                                                                                                               | 18kg per inhaler                                                                                                                                           |
| Change from HFA227ea inhaler (e.g. Flutiform™ or Symbicort MDI™) to HFA134a inhaler                  | Uses lower GWP HFA propellant                                                                                                                                                    | 20kg CO <sub>2</sub> e per inhaler                                                                                                                         |
| Recycle used MDIs                                                                                    | The plastics and aluminium are recycled and the HFA gas is captured for re-use                                                                                                   | Estimated 4-18kg per inhaler                                                                                                                               |
| Return used inhalers to pharmacy after use                                                           | If the pharmacy can't recycle the MDI it will be incinerated. This causes thermal degradation of the HFA into chemicals with far smaller global warming potential. <sup>38</sup> | Likely to be slightly lower than recycling due to the energy inputs for incineration, and the absence of recycled materials. Estimated 3-17kg per inhaler. |
| If there is no dose counter, ensure your patient knows how many doses the inhaler contains           | Reduce waste from disposing of half-used inhalers                                                                                                                                | Estimated to be a quarter of the inhaler's carbon footprint; roughly 4kg CO <sub>2</sub> e per inhaler.                                                    |

### Declaration of Interest

AJKW – no conflict of interest to declare

RB – no conflict of interest to declare

IS - no conflict of interest to declare

JS - Dr. Smith reports personal fees from Trumpington Street Medical Practice, grants and personal fees from NHS England, personal fees from World Health Organisation Europe, personal fees from Better Value Healthcare Ltd, personal fees from Cambridgeshire County Council, personal fees from University of Cambridge, outside the submitted work; and he is married to a practicing GP in Cambridgeshire.

### Data Sharing

Extra data is available by emailing alex.wilkinson2@nhs.net

### Exclusive licence

The Corresponding Author has the right to grant on behalf of all authors and does grant on behalf of all authors, a worldwide licence (<http://www.bmj.com/sites/default/files/BMJ%20Author%20Licence%20March%202013.doc>) to the Publishers and its licensees in perpetuity, in all forms, formats and media (whether known now or created in the future), to i) publish, reproduce, distribute, display and store the Contribution, ii) translate the Contribution into other languages, create adaptations, reprints, include within collections and create

1  
2  
3 summaries, extracts and/or, abstracts of the Contribution and convert or allow conversion into any format  
4 including without limitation audio, iii) create any other derivative work(s) based in whole or part on the on  
5 the Contribution, iv) to exploit all subsidiary rights to exploit all subsidiary rights that currently exist or as  
6 may exist in the future in the Contribution, v) the inclusion of electronic links from the Contribution to  
7 third party material where-ever it may be located; and, vi) licence any third party to do any or all of the  
8 above. All research articles will be made available on an open access basis (with authors being asked to  
9 pay an open access fee—see[http://www.bmj.com/about-bmj/resources-authors/forms-policies-and-](http://www.bmj.com/about-bmj/resources-authors/forms-policies-and-checklists/copyright-open-access-and-permission-reuse)  
10 [checklists/copyright-open-access-and-permission-reuse](http://www.bmj.com/about-bmj/resources-authors/forms-policies-and-checklists/copyright-open-access-and-permission-reuse)). The terms of such open access shall be governed  
11 by a Creative Commons licence—details as to which Creative Commons licence will apply to the research  
12 article are set out in our worldwide licence referred to above.  
13  
14

### 15 **Authorship statement**

16 All authors meet the required criteria for authorship:

- 17 • Substantial contributions to the conception or design of the work; or the acquisition, analysis, or  
18 interpretation of data for the work; AND
- 19 • Drafting the work or revising it critically for important intellectual content; AND
- 20 • Final approval of the version to be published; AND
- 21 • Agreement to be accountable for all aspects of the work in ensuring that questions related to the accuracy  
22 or integrity of any part of the work are appropriately investigated and resolved.

### 23 **Transparency Declaration**

24 The manuscript is an honest, accurate, and transparent account of the study being reported; that no  
25 important aspects of the study have been omitted; and that any discrepancies from the study as planned  
26 (and, if relevant, registered) have been explained.  
27

### 28 **Contributorship**

29 AJKW - helped design the study, collected and analysed the data and wrote the manuscript.

30 RB - helped design the study, collected and analysed the data and revised the manuscript.

31 IS – helped analyse the data and revise the manuscript.

32 JS- helped design the study, collected and analysed the data and revised the manuscript.  
33

### 34 **Acknowledgements**

35 Many thanks to Professor Ashley Woodcock of Manchester University for comments and help refining the  
36 manuscript.  
37

### 38 **Funding**

39 This research received no specific grant from any funding agency in the public, commercial or not-  
40 for-profit sectors?  
41  
42  
43  
44  
45  
46  
47  
48  
49  
50  
51  
52  
53  
54  
55  
56  
57  
58  
59  
60

## CHEERS checklist—Items to include when reporting economic evaluations of health interventions

| Section/item                                           | Item No | Recommendation                                                                                                                                                                                                                                                                                                              | Reported on page No/ line No                                                                |
|--------------------------------------------------------|---------|-----------------------------------------------------------------------------------------------------------------------------------------------------------------------------------------------------------------------------------------------------------------------------------------------------------------------------|---------------------------------------------------------------------------------------------|
| <b>Title and abstract</b>                              |         |                                                                                                                                                                                                                                                                                                                             |                                                                                             |
| Title                                                  | 1       | Identify the study as an economic evaluation or use more specific terms such as “cost-effectiveness analysis”, and describe the interventions compared.                                                                                                                                                                     | page 1, line 3 to 5                                                                         |
| Abstract                                               | 2       | Provide a structured summary of objectives, perspective, setting, methods (including study design and inputs), results (including base case and uncertainty analyses), and conclusions.                                                                                                                                     | page 2, line 1 to 38                                                                        |
| <b>Introduction</b>                                    |         |                                                                                                                                                                                                                                                                                                                             |                                                                                             |
| Background and objectives                              | 3       | Provide an explicit statement of the broader context for the study.                                                                                                                                                                                                                                                         | page 3, line 1 to 47                                                                        |
|                                                        |         | Present the study question and its relevance for health policy or practice decisions.                                                                                                                                                                                                                                       | page 3, line 47 to 53                                                                       |
| <b>Methods</b>                                         |         |                                                                                                                                                                                                                                                                                                                             |                                                                                             |
| Target population and subgroups                        | 4       | Describe characteristics of the base case population and subgroups analysed, including why they were chosen.                                                                                                                                                                                                                | page 4, line 1 to 15;<br>page 4, line 29 to 34;<br>page 4, line 55-60;<br>page 5, line 9-12 |
| Setting and location                                   | 5       | State relevant aspects of the system(s) in which the decision(s) need(s) to be made.                                                                                                                                                                                                                                        | page 4, line 16 to 27                                                                       |
| Study perspective                                      | 6       | Describe the perspective of the study and relate this to the costs being evaluated.                                                                                                                                                                                                                                         | page 4, line 11 to 15;                                                                      |
| Comparators                                            | 7       | Describe the interventions or strategies being compared and state why they were chosen.                                                                                                                                                                                                                                     | Page 4, line 16-26                                                                          |
| Time horizon                                           | 8       | State the time horizon(s) over which costs and consequences are being evaluated and say why appropriate.                                                                                                                                                                                                                    | Page 4, line 3-4                                                                            |
| Discount rate                                          | 9       | Report the choice of discount rate(s) used for costs and outcomes and say why appropriate.                                                                                                                                                                                                                                  | Not applicable                                                                              |
| Choice of health outcomes                              | 10      | Describe what outcomes were used as the measure(s) of benefit in the evaluation and their relevance for the type of analysis performed.                                                                                                                                                                                     | Page 5, lines 19-24                                                                         |
| Measurement of effectiveness                           | 11a     | <i>Single study-based estimates:</i> Describe fully the design features of the single effectiveness study and why the single study was a sufficient source of clinical effectiveness data.                                                                                                                                  | Not applicable.                                                                             |
|                                                        | 11b     | <i>Synthesis-based estimates:</i> Describe fully the methods used for identification of included studies and synthesis of clinical effectiveness data.                                                                                                                                                                      |                                                                                             |
| Measurement and valuation of preference based outcomes | 12      | If applicable, describe the population and methods used to elicit preferences for outcomes.                                                                                                                                                                                                                                 | not applicable                                                                              |
| Estimating resources and costs                         | 13a     | <i>Single study-based economic evaluation:</i> Describe approaches used to estimate resource use associated with the alternative interventions. Describe primary or secondary research methods for valuing each resource item in terms of its unit cost. Describe any adjustments made to approximate to opportunity costs. | Page 4, lines 28-60;<br>page 5, lines 10-13                                                 |

| Section/item                         | Item No | Recommendation                                                                                                                                                                                                                                                                                                                                        | Reported on page No/ line No                                                                                            |
|--------------------------------------|---------|-------------------------------------------------------------------------------------------------------------------------------------------------------------------------------------------------------------------------------------------------------------------------------------------------------------------------------------------------------|-------------------------------------------------------------------------------------------------------------------------|
|                                      | 13b     | <i>Model-based economic evaluation:</i> Describe approaches and data sources used to estimate resource use associated with model health states. Describe primary or secondary research methods for valuing each resource item in terms of its unit cost. Describe any adjustments made to approximate to opportunity costs.                           | Financial resources:<br>Page 4, lines 28-60;<br>page 5, lines 10-13;<br>Carbon costs:<br>page 5 lines 26-page 6 line 27 |
| Currency, price date, and conversion | 14      | Report the dates of the estimated resource quantities and unit costs. Describe methods for adjusting estimated unit costs to the year of reported costs if necessary. Describe methods for converting costs into a common currency base and the exchange rate.                                                                                        | Page 4, lines 3-4                                                                                                       |
| Choice of model                      | 15      | Describe and give reasons for the specific type of decision-analytical model used. Providing a figure to show model structure is strongly recommended.                                                                                                                                                                                                | Page 4, lines 16-23;<br>table 1                                                                                         |
| Assumptions                          | 16      | Describe all structural or other assumptions underpinning the decision-analytical model.                                                                                                                                                                                                                                                              | Page 5, lines 19-21;<br>Page 5, lines 48-50<br>Page 6 lines 25-28<br>Table 1                                            |
| Analytical methods                   | 17      | Describe all analytical methods supporting the evaluation. This could include methods for dealing with skewed, missing, or censored data; extrapolation methods; methods for pooling data; approaches to validate or make adjustments (such as half cycle corrections) to a model; and methods for handling population heterogeneity and uncertainty. | Page 4, lines 12-14;<br>Page 5 lines 16-21;                                                                             |
| <b>Results</b>                       |         |                                                                                                                                                                                                                                                                                                                                                       |                                                                                                                         |
| Study parameters                     | 18      | Report the values, ranges, references, and, if used, probability distributions for all parameters. Report reasons or sources for distributions used to represent uncertainty where appropriate. Providing a table to show the input values is strongly recommended.                                                                                   | Page 6, lines 42- page 7 line40<br>Table 1                                                                              |
| Incremental costs and outcomes       | 19      | For each intervention, report mean values for the main categories of estimated costs and outcomes of interest, as well as mean differences between the comparator groups. If applicable, report incremental cost-effectiveness ratios.                                                                                                                | Page 6 lines 45-51;<br>Page 6 line 55;<br>Page 6 line 58;<br>Page 7 line 3-23                                           |
| Characterising uncertainty           | 20a     | <i>Single study-based economic evaluation:</i> Describe the effects of sampling uncertainty for the estimated incremental cost and incremental effectiveness parameters, together with the impact of methodological assumptions (such as discount rate, study perspective).                                                                           |                                                                                                                         |
|                                      | 20b     | <i>Model-based economic evaluation:</i> Describe the effects on the results of uncertainty for all input parameters, and uncertainty related to the structure of the model and assumptions.                                                                                                                                                           | Page 8, lines 26-35;<br>Page 8 lines 50-51;                                                                             |
| Characterising heterogeneity         | 21      | If applicable, report differences in costs, outcomes, or cost-effectiveness that can be explained by variations between subgroups of patients with different baseline characteristics or                                                                                                                                                              | not applicable                                                                                                          |

| Section/item                                                         | Item No | Recommendation                                                                                                                                                                                                                                    | Reported on page No/ line No                   |
|----------------------------------------------------------------------|---------|---------------------------------------------------------------------------------------------------------------------------------------------------------------------------------------------------------------------------------------------------|------------------------------------------------|
|                                                                      |         | other observed variability in effects that are not reducible by more information.                                                                                                                                                                 |                                                |
| <b>Discussion</b>                                                    |         |                                                                                                                                                                                                                                                   |                                                |
| Study findings, limitations, generalisability, and current knowledge | 22      | Summarise key study findings and describe how they support the conclusions reached. Discuss limitations and the generalisability of the findings and how the findings fit with current knowledge.                                                 | Page 7 line 3- page 9 line 57                  |
| <b>Other</b>                                                         |         |                                                                                                                                                                                                                                                   |                                                |
| Source of funding                                                    | 23      | Describe how the study was funded and the role of the funder in the identification, design, conduct, and reporting of the analysis. Describe other non-monetary sources of support.                                                               | Information provided via the submission system |
| Conflicts of interest                                                | 24      | Describe any potential for conflict of interest of study contributors in accordance with journal policy. In the absence of a journal policy, we recommend authors comply with International Committee of Medical Journal Editors recommendations. | Information provided via the submission system |

For consistency, the CHEERS statement checklist format is based on the format of the CONSORT statement checklist



# BMJ Open

## The costs of switching to low global-warming potential inhalers. An economic and carbon footprint analysis of NHS prescription data in England.

|                                 |                                                                                                                                                                                                                                                                                                                                                           |
|---------------------------------|-----------------------------------------------------------------------------------------------------------------------------------------------------------------------------------------------------------------------------------------------------------------------------------------------------------------------------------------------------------|
| Journal:                        | <i>BMJ Open</i>                                                                                                                                                                                                                                                                                                                                           |
| Manuscript ID                   | bmjopen-2018-028763.R2                                                                                                                                                                                                                                                                                                                                    |
| Article Type:                   | Original research                                                                                                                                                                                                                                                                                                                                         |
| Date Submitted by the Author:   | 17-Sep-2019                                                                                                                                                                                                                                                                                                                                               |
| Complete List of Authors:       | Wilkinson, Alexander; East and North Hertfordshire NHS Trust, Respiratory Department<br>Braggins, Rory; University of Cambridge Department of Public Health and Primary Care, School of Clinical Medicine<br>Steinbach, Ingeborg; Centre for Sustainable Healthcare<br>Smith, James; University of Cambridge Department of Public Health and Primary Care |
| <b>Primary Subject Heading</b>: | Respiratory medicine                                                                                                                                                                                                                                                                                                                                      |
| Secondary Subject Heading:      | Health economics                                                                                                                                                                                                                                                                                                                                          |
| Keywords:                       | Asthma < THORACIC MEDICINE, HEALTH ECONOMICS, RESPIRATORY MEDICINE (see Thoracic Medicine), Adult thoracic medicine < THORACIC MEDICINE, Chronic airways disease < THORACIC MEDICINE                                                                                                                                                                      |
|                                 |                                                                                                                                                                                                                                                                                                                                                           |

SCHOLARONE™  
Manuscripts

1  
2  
3 **The costs of switching to low global-warming potential inhalers. An economic and**  
4 **carbon footprint analysis of NHS prescription data in England.**  
5  
6  
7

8 **Corresponding Author**  
9

10 Alexander JK Wilkinson, Respiratory Department, East and North Hertfordshire NHS  
11 Trust, Lister Hospital, Corey's Mill Lane, Stevenage, SG1 4AB, UK  
12  
13

14  
15  
16 Email: [Alex.wilkinson2@nhs.net](mailto:Alex.wilkinson2@nhs.net)  
17

18  
19 Tel: 07843209392 01480 234936  
20

21 **Co-Authors:**  
22

23  
24 Rory Braggins University of Cambridge Department of Public Health and Primary Care,  
25 School of Clinical Medicine, Cambridge, Cambridgeshire, UK  
26  
27

28  
29 Ingeborg Steinbach, Centre for Sustainable Healthcare, Oxford, Oxfordshire, UK  
30

31  
32 James Smith, University of Cambridge Department of Public Health and Primary Care  
33 Cambridge, Cambridgeshire, UK  
34  
35

36  
37 **Keywords:** Asthma, Chronic Airways Disease, Respiratory Medicine, Health Economics  
38

39  
40 **Word count** (excluding title page, abstract, references, figures and tables): 3491  
41  
42  
43  
44  
45  
46  
47  
48  
49  
50  
51  
52  
53  
54  
55  
56  
57  
58  
59  
60

## Abstract

**Objectives:** Metered dose inhalers (MDIs) contain propellants which are potent greenhouse gases. Many agencies propose a switch to alternative, low global warming potential (GWP) inhalers, such as dry powder inhalers (DPIs). We aimed to analyse the impact on greenhouse gas emissions and drug costs of making this switch.

**Setting:** We studied NHS prescription data from England in 2017 and collated carbon footprint data on inhalers commonly used in England.

**Design:** Inhalers were separated into different categories according to their mechanisms of action (e.g. short-acting beta agonist). Within each category we identified low and high GWP inhalers and calculated the cost and carbon impact of changing to low-GWP inhalers. We modelled scenarios for swapping proportionally according to the current market share of each equivalent DPI (model 1) and switching to the lowest cost pharmaceutically equivalent DPI (model 2). We also reviewed available data on the carbon footprint of inhalers from scientific publications, independently certified reports and patents to provide more accurate carbon footprint information on different types of inhalers.

**Results:** If MDIs using HFA propellant are replaced with the cheapest equivalent DPI, then for every 10% of MDIs changed to DPIs, drug costs decrease by £8.2M annually. However if the brands of DPIs stay the same as 2017 prescribing patterns, for every 10% of MDIs changed to DPIs, drug costs increase by £12.7M annually. Most potential savings are due to less expensive LABA/ICS inhalers. Some reliever inhalers (e.g. Ventolin™) have a carbon footprint over 25kgCO<sub>2</sub>e per inhaler, whilst others use far less HFA134a (e.g. Salamol™) with a carbon footprint of less than 10kgCO<sub>2</sub>e per inhaler. HFA227ea LABA/ICS inhalers (e.g. Flutiform™) have a carbon footprint over 36kgCO<sub>2</sub>e, compared to an equivalent HFA134a combination inhaler (e.g. Fostair™) at less than 20kgCO<sub>2</sub>e. For every 10% of MDIs changed to DPIs, 58ktCO<sub>2</sub>e could be saved annually in England.

**Conclusions:** Switching to DPIs would result in large carbon savings and can be achieved alongside reduced drug costs by using less expensive brands. Substantial carbon savings can be made by using small volume HFA134a MDIs, in preference to large volume HFA134a MDIs, or those containing HFA227ea as a propellant.

## Strengths and limitations of this study

- This article draws together a variety of sources of information to demonstrate significant differences in the global warming potential (GWP) of different inhalers.
- The NHS digital database provided a large, reliable dataset for us to analyse cost and greenhouse gas release in various scenarios.

- We calculated cost and greenhouse gas emissions for various scenarios in which inhalers are changed, and for different classes of inhalers (e.g. inhaled steroids, beta-agonists).
- We were unable to analyse national prescription data by diagnosis and do not know which of the inhalers might have been used for asthma, COPD or other diagnoses.
- Detailed information about the carbon footprint of all inhalers is not publicly available.

## Introduction

Metered-dose inhalers contain propellants, which are liquefied, compressed gases used as a driving force and an energy source for atomisation of the drug. Chlorofluorocarbons (CFCs), which were used originally, are both potent greenhouse gases (GHGs) and ozone-depleting substances, and were banned under the Montreal Protocol. They have been replaced by two hydrofluoroalkane (HFA) propellants; 1,1,1,2-tetrafluoroethane (HFA134a) and 1,1,1,2,3,3,3-heptafluoropropane (HFA227ea).<sup>1</sup> Currently MDIs contribute an estimated 3.9% of the carbon footprint of the National Health Service in the UK, because HFAs are potent GHGs.<sup>2</sup> The UK has a high proportion of MDI use (70%) compared to less than 50% in the rest of Europe, and only about 10% in Scandinavia.<sup>3</sup> The most commonly used MDIs in the UK contain salbutamol reliever, though there is pressure to reduce excessive reliever use, which has been linked with poor outcomes in asthma, in favour of controller therapies.<sup>4</sup>

Combating climate change has been described as “the greatest public health opportunity of the 21<sup>st</sup> century”.<sup>5</sup> HFAs are used mainly as refrigerants and are controlled under national F-gas regulations, and the Kigali Amendment to the Montreal Protocol. As F-gas use is phased out, HFA MDIs will become a significant proportion of overall HFA use, especially in the UK, because of the high level of use of MDIs.

There have been calls to switch away from HFA MDIs because of their environmental impact.<sup>6</sup> Effective HFA-free alternatives are already available, as DPIs and aqueous mist inhalers. Switching to inhalers with lower global warming potential (GWP) is a key part of the NHS Sustainable Development Unit’s strategy.<sup>7</sup> In 2017 the British Thoracic Society recommended that prescribers and patients “consider switching pMDIs to non-propellant devices whenever they are likely to be equally effective”.<sup>8</sup> In May 2018 the UK’s Environmental Audit Committee recommended the NHS set a target of reducing to 50% low-GWP inhalers by 2022.<sup>9</sup> In January 2019 the NHS long term plan proposed a 50% reduction in the greenhouse gas emissions from inhalers in 10 years,<sup>10</sup> and established an expert working group to evaluate potential strategies to achieve this.<sup>11</sup> There is patchy information about the carbon footprint of inhalers. Life-cycle analysis of salbutamol MDIs has shown that 95-98% of its carbon footprint derives from the use-phase, when the propellant is released and this dwarfs manufacturing processes.<sup>12,13,14</sup> This article collates and analyses information on type and volume of emitted propellant.

A significant barrier to switching away from MDIs might be the higher “up-front” price of some DPIs; however, the price of MDIs doesn’t take into account the long-term financial cost of their environmental

1  
2  
3 impact. We investigate a variety of scenarios for altered inhaler prescription patterns in England, and the  
4 cost implications of switching to MDIs.  
5

## 6 7 **Methods**

### 8 9 **Financial analysis**

10  
11 We used 2017 prescription data from NHS digital website, including the number of inhalers prescribed and  
12 net ingredient cost.<sup>15</sup> We separated inhalers into different categories; short-acting beta agonists (SABAs),  
13 inhaled corticosteroids (ICS), long-acting beta agonists (LABAs), short-acting muscarinic antagonists  
14 (SAMAs), long-acting muscarinic antagonists (LAMAs) and combination devices. Within these categories  
15 we identified high GWP inhalers which contain HFA propellant, and low GWP inhalers which were DPIs  
16 and Respimat™ devices. The least expensive low-GWP inhaler in each inhaler category was identified,  
17 and the cost and carbon impact of changing inhalers determined in various scenarios. Some discontinued  
18 inhalers and those prescribed in very low numbers (less than 500 a year) were excluded from the analysis.  
19  
20  
21  
22  
23

24 In Model 1, we replaced MDIs with DPIs in the same proportions that brands of DPIs had been prescribed  
25 in England 2017, which we called “proportional replacement”. For example if three DPI inhalers (A, B and  
26 C) made up 50%, 30% and 20% of the DPIs in that category, then proportional replacement would switch  
27 50% of the MDIs to DPI inhaler A, 30% to B and 20% to C. The number of MDIs declines and DPIs  
28 increase, whilst the proportions of each DPI used stays the same.  
29  
30  
31  
32

33 In Model 2, we replaced MDIs with the cheapest available equivalent DPI. We modelled several  
34 alternative scenarios described below and in table 1.  
35

36  
37 *Short-acting beta agonists (SABA; salbutamol).* In 2017 the least expensive MDI salbutamol was £1.88  
38 versus the least expensive DPI salbutamol Salbulin Novolizer™ at £3.36 for 200-dose inhaler. However  
39 the Salbulin Novolizer™ is rarely used in the UK, with only 1,015 prescriptions in 2017, so we modelled  
40 an alternative scenario in which we changed MDIs to Salbutamol Easyhaler™ instead (£3.85 per inhaler).  
41  
42  
43

44  
45 *Long-acting beta agonists (LABA).* The least expensive LABA in 2017 was Formoterol Easyhaler™, which  
46 is similarly priced to the least expensive MDI LABA at £25.37 per inhaler.  
47

48  
49 *Inhaled corticosteroids (ICS).* We divided ICS inhalers as described in BTS/SIGN guidance into very low,  
50 low, medium and high strength inhalers.<sup>4</sup> We identified the least expensive equivalent DPI ICS in each  
51 category. These were Flixotide 50 Accuhaler™ (£8.54 per inhaler) one inhalation BD for very low strength,  
52 Beclometasone 200 Easyhaler™ (£16.85 per inhaler) one inhalation BD for low strength and two  
53 inhalations bd for medium strength, Budesonide 400 Easyhaler™ (£20.39 per inhaler) two inhalations BD  
54 for high strength.  
55  
56  
57

58  
59 *LABA/ICS combination inhalers.* We divided inhalers into low, medium and high strength inhaled  
60 corticosteroids. The least expensive DPI inhalers were Seretide 100 Accuhaler™ (£23.89 per inhaler),

1  
2  
3 Relvar 92/22 Ellipta™ (£25.31 per inhaler) and Fostair 200/6 Nexthaler™ (£33.28 per inhaler) respectively.  
4 Relvar™ is a once-daily inhaler which would result in a change in dosing regimen for many patients, and it  
5 is also not licensed for maintenance and reliever therapy in asthma patients. We therefore modelled an  
6 alternative scenario whereby we switched medium strength LABA/ICS combination inhalers to Fostair  
7 100/6 Nexthaler™ (£33.42 per inhaler).  
8  
9  
10

11 *Short and long-acting muscarinic antagonists and LAMA/LABA combination inhalers.* We did not change  
12 these inhalers in our model as all SAMAs are MDI and all LAMAs and LAMA+LABA devices are DPI or  
13 aqueous mist inhalers. There are potential clinical and environmental benefits from switching SAMA to  
14 LAMA inhalers.<sup>16</sup>  
15  
16  
17

18  
19 *LABA/LAMA/ICS inhalers.* Two of these “triple” inhalers became available for the first time in 2017, one  
20 MDI (Trimbow™ at £47.42) and one DPI (Trelegy™ at £58.10 per inhaler).  
21  
22

### 23 **Greenhouse gas analysis**

24 Information on the amount of HFA propellant in MDIs is not publically available, so alternative sources of  
25 information were sought. Studies have estimated the contents of MDIs by weighing empty and full  
26 inhalers, and patents also provide some data. The carbon footprint was estimated by multiplying the  
27 estimated weight of HFA propellant by its GWP. GWP is a measure of how much heat a greenhouse gas  
28 traps in the atmosphere over a specific time, relative to carbon dioxide. For the purposes of this article, we  
29 used GWP values of HFAs for a 100-year time horizon as reported in the IPCC Fifth Assessment Report.<sup>17</sup>  
30  
31  
32  
33

34  
35 We identified the 20 most commonly prescribed MDIs using NHS prescribing data.<sup>18</sup> We searched google  
36 patents search engine (<https://patents.google.com/>) using the search terms “inhaler name” or “drug name”  
37 AND HFA or HFA134a or HFA227ea. Links and citations from relevant results were followed. We also  
38 reviewed data from the Montreal Protocol Medical Technical Options Committee.<sup>19</sup>  
39  
40  
41

42 The carbon footprint of commonly prescribed inhalers is summarised in table 2. All Salbutamol MDIs use  
43 HFA134a, with a GWP of 1,300. There are two types of salbutamol MDIs, one a small volume MDI  
44 containing alcohol as a co-solvent, which requires less HFA propellant than the large volume alcohol-free  
45 type.<sup>20</sup> A study comparing a large volume inhaler Ventolin Evohaler™ with small volume Salamol™  
46 inhaler found the weight of the contents (mainly HFA134a propellant) to be 17.32 and 7.88g respectively.  
47 A GSK patent for salbutamol MDI shows inhalers containing 18.2g and 19.8g of HFA134a.<sup>21,22</sup> GSK  
48 published a Carbon Trust certified carbon footprint analysis which estimated Ventolin™ to have a carbon  
49 footprint of 28kgCO<sub>2</sub>e/inhaler, far greater than a small volume inhaler (Proventil™) at around  
50 10kgCO<sub>2</sub>e/inhaler.<sup>23,12</sup>  
51  
52  
53  
54  
55

56 For SAMAs we used manufacturer’s product carbon footprint data on Atrovent™ which has a product  
57 carbon footprint of 14.59kg.<sup>14</sup>  
58  
59  
60

1  
2  
3 For ICS, comparison of two patents for beclometasone inhalers, suggest that those with alcohol use around  
4 half the HFA134a propellant (12.3g with alcohol versus 20g of HFA134a alone) of HFA134a.<sup>24,25</sup>  
5  
6

7 For LABA/ICS combination inhalers, one patent for Fluticasone/Salmeterol MDI (Seretide™) contained  
8 18.2g of HFA134a.<sup>21</sup> GSK published carbon footprint estimates 19kgCO<sub>2</sub>e/inhaler for their LABA,  
9 ICS/LABA and LABA MDIs. However, an FDA report on the US Advair™ brand of  
10 Fluticasone/Salmeterol MDI stated the inhaler has a net weight of just 12g/inhaler.<sup>26</sup>  
11  
12

13 Two LABA/ICS MDIs (Symbicort™ MDI and Flutiform™) use HFA227ea as a propellant, which has  
14 higher GWP of 3,320. A patent for Flutiform™ indicates it contains 11g (+/-0.5g) of HFA227ea, resulting  
15 in the largest carbon footprint of any inhaler at 36.5kgCO<sub>2</sub>e/inhaler.<sup>27</sup>  
16  
17

18  
19 Currently both LAMA alone, and LAMA/LABA combinations are exclusively available in the UK as  
20 DPIs. There is only one triple ICS/LAMA/LABA combination available in an MDI, and no data on  
21 propellant volume could be found (Trimbow™).  
22  
23

### 24 **DPIs and aqueous mist inhalers**

25  
26  
27 DPIs and aqueous mist inhalers (such as Respimat™) do not contain HFAs. The Medical Technical  
28 Options Committee of the United Nations estimated the carbon footprint of a DPI to be between 1.5kg and  
29 6kg CO<sub>2</sub>e for a 200-dose inhaler (7.5g-30g/dose) but most DPIs contain far fewer than 200 doses.<sup>19</sup> GSK's  
30 Carbon Trust-verified analysis of their DPIs (containing one months' treatment) found a carbon footprint  
31 of slightly less than one kilogram CO<sub>2</sub>e/inhaler.<sup>23</sup> Product carbon footprint analysis of Spiriva Respimat™  
32 published by the manufacturers found it to have a carbon footprint of 780gCO<sub>2</sub>e, but potentially lower if  
33 refill cartridges are used.<sup>14</sup> For our analyses we assumed a carbon footprint of 1kg CO<sub>2</sub>e per DPI, and used  
34 the mid-point of the range of carbon footprints for each class of MDI.  
35  
36  
37  
38  
39

### 40 **Patient and Public Involvement**

41  
42 A prior survey conducted in Hertfordshire, UK by one of the authors (AW) found that eighty six percent of  
43 patients agreed that both cost and carbon footprint are important factors to consider when changing  
44 inhalers, although ease of use was considered the most important factor overall.<sup>28</sup>  
45  
46  
47

### 48 **Results**

#### 49 **Financial implications**

50  
51  
52 By analysing NHS prescription data, we modelled how prescription costs would change in various  
53 different prescription scenarios. In Model 1, we replaced MDIs with DPIs in the same proportions that  
54 brands of DPIs had been prescribed in England 2017, which we called "proportional replacement". In this  
55 scenario for every 10% of MDIs changed the total cost *increased* by £12.7M annually. In Model 2, we  
56 replaced MDIs with the cheapest available equivalent DPI. In this scenario for every 10% of MDIs  
57  
58  
59  
60

1  
2  
3 changed total cost *decreased* by £8.2M annually, but we saw different price changes for different types of  
4 inhalers..  
5

6  
7 *Short-acting beta agonists (SABA; salbutamol)*. When Salbutamol MDIs were replaced with Salbutin  
8 Novolizer™ costs rose £2.02M for every 10% of MDIs changed. As Salbutin Novolizer™ is rarely used in  
9 the UK, we modelled an alternative scenario in which we changed MDIs to Salbutamol Easyhaler™  
10 whereby costs rose £3.01M for every 10% of inhalers changed.  
11  
12

13  
14 *Long-acting beta agonists (LABA)*. When switching to Formoterol Easyhaler™ savings of £1.02M were  
15 made for every 10% of MDIs changed. For proportional replacement, costs increased by £1.47M for every  
16 10% of MDIs changed.  
17

18  
19 *Inhaled corticosteroids (ICS)*. We found costs increased slightly; £207K for every 10% of MDIs switched  
20 to the cheapest DPI. For proportional replacement costs rose £8.25M for every 10% of MDIs changed.  
21  
22

23  
24 *LABA/ICS combination inhalers*. We saw large cost savings; £10.0M saved for every 10% of MDIs  
25 switched to the least expensive DPI LABA/ICS. When switching to Fostair 100/6 Nexthaler™ instead of  
26 Relvar 92/22 Ellipta™, as Fostair also has a license for maintenance and reliever therapy, we saw more  
27 modest cost savings of £6.25M for every 10% of MDIs switched. For “proportional” replacement costs fell  
28 £668K for every 10% of MDIs changed.  
29  
30

31  
32 *LABA/ LAMA/ICS inhalers*. In 2017 only 5,211 of these inhalers were prescribed and the cost of switching  
33 from MDI to DPI was £555K for every 10% of inhalers switched.  
34

### 35 **Carbon footprint**

36  
37 We found some reliever inhalers (e.g. Ventolin™) to have a carbon footprint over 25kgCO<sub>2</sub>e per inhaler,  
38 whilst others use far less HFA134a (e.g. Salamol™) with a carbon footprint of less than 10kgCO<sub>2</sub>e per  
39 inhaler. HFA227ea LABA/ICS inhalers (e.g. Flutiform™) have a carbon footprint over 36kgCO<sub>2</sub>e,  
40 compared to an equivalent HFA134a combination inhaler (e.g. Fostair™) at less than 20kgCO<sub>2</sub>e. We  
41 estimated the total carbon footprint of MDIs prescribed in the community in England in 2017 to be 635kt  
42 CO<sub>2</sub>e. For every 10% of HFA MDIs changed to low-GWP devices 58ktCO<sub>2</sub>e could be saved annually.  
43 Reaching the EAC target of 50% of inhalers being low-GWP devices by 2022, would save 288ktCO<sub>2</sub>e  
44 every year. Reducing the proportion of high-GWP devices to 10%, as seen in Sweden, would result in  
45 carbon savings 519ktCO<sub>2</sub>e every year.  
46  
47  
48  
49  
50

### 51 **Discussion**

52  
53 If prescribers switch from high GWP to the least expensive low GWP options within each therapeutic  
54 category, major financial savings could be made alongside large carbon reductions. Most of the savings are  
55 seen by switching from more expensive LABA/ICS MDIs to less expensive DPIs. These potential savings  
56  
57  
58  
59  
60



1  
2  
3 would exceed the cost of switching the larger volume of Salbutamol MDIs to DPIs, because the  
4 incremental cost per salbutamol inhaler (less than £2/inhaler) is much lower.  
5  
6

7 A second option in which prescribers switch from MDI to the DPIs according to the current proportions of  
8 brand prescribing, would be more expensive. Neither clinicians nor formularies would likely support a  
9 switch to equivalent inhalers which were more expensive. A third option in which prescribers switch from  
10 an MDI to DPI for the same branded LABA/ICS combination (e.g. Seretide™ or Fostair™) is generally  
11 either cost neutral or less expensive.  
12  
13  
14

15 There is recent focus on cost-effectiveness, which takes into account ease of use, dose frequency and other  
16 “softer” factors that would encourage adherence, impact clinical outcomes and in turn economic cost in the  
17 real world. Poor inhaler technique is very common and greatly limits the effectiveness of inhaled  
18 medications. The most recent large meta-analysis identified fewer errors overall with DPIs, even when  
19 MDI users had spacers.<sup>29</sup> The Salford lung study was a large, pragmatic randomised trial that showed  
20 improved clinical outcomes in asthma and COPD patients assigned to once daily Relvar™ DPI instead of  
21 their usual inhaler (which was an MDI in 68%).<sup>30,31</sup> One historical matched cohort study found better  
22 asthma control in patients initiated on an MDI compared to DPI, but this study only compared Seretide  
23 Evohaler and Accuhaler.<sup>32</sup> A similar matched cohort study demonstrated asthma patients can be switched  
24 from other ICS inhalers to the Easyhaler™ with no reduction in clinical effectiveness or change in cost.<sup>33</sup>  
25 Another similar study found better asthma control and fewer exacerbations in patients starting or  
26 increasing strength of DPIs or breath-actuated inhalers compared to pMDIs.<sup>34</sup> A further benefit of DPIs is  
27 that they use a dose counter, whereas Salbutamol and ICS MDIs generally do not. Patients often cannot  
28 determine when their MDIs are empty and either throw away half full inhalers, or conversely continue to  
29 use empty inhalers unknowingly.<sup>35</sup>  
30  
31  
32  
33  
34  
35  
36  
37  
38

39 Our cost analysis has a number of limitations. Our data only includes community prescriptions in England;  
40 hospital prescriptions are not included. However, patients receiving prescriptions from hospital are likely  
41 to have more severe disease requiring combination inhalers, so the potential cost savings could be even  
42 greater. Our models do not include the impact of future changes in prescribing practice such as the recent  
43 introduction of triple LAMA/LABA/ICS inhalers. In reality costs are in flux and subject to market  
44 pressures, but our analysis allows comparison between treatments at a specific time point.  
45  
46  
47  
48

49 The MDIs assessed were found to have a wide range of carbon footprints; 10-37 times that of a DPI. The  
50 UK government reports incorrectly assumes that all inhalers contain 12g of propellant.<sup>36</sup> Even among  
51 MDIs, those containing HFA227ea propellant or large volume HFA134a propellant have twice the carbon  
52 footprint or more compared to small volume MDIs. Around 6.5 million large volume MDIs for salbutamol  
53 were prescribed in England in 2016, and switching these to small volume MDIs could save 159ktCO<sub>2</sub>e in  
54 England alone, with little clinical or patient impact.<sup>37</sup> Our findings provide a potentially more accurate  
55 model that could be transferred to other countries wanting to monitor and regulate MDIs in relation to  
56 carbon footprint.  
57  
58  
59  
60

1  
2  
3 Inhaler recycling has the potential to reduce the environmental impact of inhalers through recovery of  
4 propellant, although so far uptake has been very low with less than 1% of MDIs recovered and of little  
5 measurable impact in climate terms.<sup>13</sup> Where recycling is not available, incinerating MDIs with medicines  
6 waste is an effective strategy; this causes thermal degradation of the HFA into chemicals with far smaller  
7 global warming potential.<sup>38</sup> A study of inhalers returned for recycling jointly funded by GSK and NHS  
8 Grampian showed that 48% of doses remain in MDIs, compared to just 27% in DPIs.<sup>39</sup> This highlights the  
9 importance of explaining to patients the number of doses their inhaler contains as part of inhaler technique  
10 training. This also means that a significant proportion of the propellant could be captured, and that the  
11 carbon footprint of MDIs potentially roughly halved if they were all recycled and the HFA propellant  
12 reused. At the end of their useful life HFA must be incinerated however, and it's possible that recycling  
13 HFAs could provide further opportunities for atmospheric release by delaying incineration. Other  
14 strategies to reduce greenhouse gas emissions from MDIs are summarised in table 3.

21  
22 An important question is whether to switch to DPIs now, or wait for reformulated MDIs with novel low  
23 GWP propellants. Three low GWP propellants have been considered, isobutane, HFA152a and HFO  
24 1234ea. An isobutane programme has been underway for a decade in Argentina, but not yet been  
25 commercialised. HFA152a has a lower carbon footprint (one tenth of HFA134a) and HFO1234ea zero,  
26 but both remain at early stage development.<sup>1</sup> Very large clinical trials will be required to establish their  
27 safety, alone and then in combination with every moiety that uses them. Transition to a novel propellant(s)  
28 would likely take at least a decade based on experience from the transition from CFCs,<sup>40</sup> although this may  
29 be cost-effective from a worldwide perspective, especially in developing countries.

34  
35 Several papers assert that some patients are unable to generate the inspiratory flows necessary to activate  
36 DPIs, particularly during exacerbations.<sup>41-42</sup> However, 93% of prescriptions for LAMA or LAMA/LABA  
37 devices for COPD in England are for DPIs, suggesting clinicians believe the vast majority of patients can  
38 use a DPI effectively.<sup>18</sup> In contrast, 94% of SABA prescriptions are for MDIs leading to a confusing  
39 mixture of inhalation techniques.<sup>18</sup> COPD patients whose inhaler devices use the same inhalation  
40 technique show better clinical outcomes than those prescribed devices requiring different techniques.<sup>43</sup> One  
41 small study examined patients' ability to use MDIs and DPIs effectively during the course of an  
42 exacerbation and found best results from an Accuhaler™ DPI which has medium resistance but is effective  
43 at relatively low peak inspiratory flow rates of 30L/min.<sup>44</sup> Switching to DPI SABAs could potentially lead  
44 to a simplification of inhalation technique, an improvement in care and a reduction in carbon footprint. A  
45 recent proposal suggests a reliever MDI + spacer could be kept separately in an emergency pack in case of  
46 exacerbations.<sup>45</sup> Whatever inhalers are used, adequate patient training and assessment of inhaler technique  
47 will be essential for efficient and effective inhaler use.<sup>29</sup>

55  
56 Patients care about the carbon footprint of their inhalers. One survey of inhaler users found that 78% rated  
57 carbon footprint as important; equally important to them as financial cost.<sup>28</sup> Changing one MDI device to a  
58 DPI could save 150kg to 400kg CO<sub>2</sub>e annually; roughly equivalent to installing wall insulation at home,  
59  
60

1  
2  
3 recycling, or cutting out meat.<sup>46</sup> These are individual actions that many environmentally concerned  
4 individuals are keen to take.  
5

6  
7 Our carbon footprint results for England are consistent with other studies of MDIs in the UK (which  
8 included Scotland, Wales and Northern Ireland), which show that they contribute approximately a megaton  
9 of CO<sub>2</sub>e to global greenhouse gas emissions. Climate change is estimated to kill 250,000 people annually  
10 by 2030, particularly vulnerable people in financially poor countries.<sup>47</sup> Physicians should not shy away  
11 from these issues, and tools, such as NICE's recent patient decision aid for asthma inhalers are to be  
12 welcomed.<sup>48</sup>  
13  
14  
15

## 16 17 **Conclusions**

18  
19 Climate change is a huge and present threat to health which will disproportionately impact the poorest and  
20 most vulnerable on the planet, including people with pre-existing lung disease. Every effort must be made  
21 to minimise greenhouse gas release to protect current and future generations from the worst effects of  
22 climate change.  
23  
24  
25

26  
27 Switching to low GWP inhalers can be achieved whilst making financial savings in terms of drug costs.  
28 Patients, prescribers and guideline authors should carefully consider the carbon footprint of these inhalers  
29 and where they are likely to be equally effective, prioritise low GWP inhalers.  
30  
31

32  
33 Where MDIs are considered necessary, other steps can be taken immediately to reduce their environmental  
34 impact. Smaller volume HFA134a inhalers should be prioritised over larger volume or HFA227ea-  
35 containing inhalers, manufacturers should consider phasing out the use of HFA227ea, and patients,  
36 manufacturers and clinicians should publicise and encourage inhaler recycling.  
37  
38  
39  
40  
41  
42  
43  
44  
45  
46  
47  
48  
49  
50  
51  
52  
53  
54  
55  
56  
57  
58  
59  
60

## References

- 1 Myrdal PB, Sheth P, Stein SW. Advances in Metered Dose Inhaler Technology: Formulation Development. *AAPS PharmSciTech* 2014; **15**: 434–55.
- 2 NHS Sustainable Development Unit. Reducing the use of natural resources in health and social care. 2018 Report. 2018; : 1–31.
- 3 Lavorini F, Corrigan CJ, Barnes PJ, *et al*. Retail sales of inhalation devices in European countries: So much for a global policy. *Respir Med* 2016; **105**: 1099–103.
- 4 BTS/SIGN British Guideline for the management of asthma, 2016, SIGN 153. <http://www.sign.ac.uk/sign-153-british-guideline-on-the-management-of-asthma.html>.
- 5 Wang H, Horton R. Tackling climate change: the greatest opportunity for global health. *Lancet* 2015. DOI:10.1016/S0140-6736(15)60931-X.
- 6 Hillman T, Mortimer F, Hopkinson NS. Inhaled drugs and global warming: time to shift to dry powder inhalers. *BMJ* 2013; **346**. <http://www.bmj.com/content/346/bmj.f3359.abstract>.
- 7 NHS Sustainable Development Unit. Sustainable Development in the Health and Care System: Health Check 2016. 2016; : 16.
- 8 British Thoracic Society. THE ENVIRONMENT AND LUNG HEALTH POSITION STATEMENT • January 2017. 2017. <https://www.brit-thoracic.org.uk/document-library/audit-and-quality-improvement/environment-and-lung-health/the-environment-and-lung-health/>.
- 9 Creagh M, Labour MP, Clark C, Conservative MP. Environmental Audit Committee UK Progress on reducing F-gas Emissions. 2018.
- 10 The NHS Long Term Plan. London, 2019 [www.longtermplan.nhs.uk](http://www.longtermplan.nhs.uk).
- 11 Centre for Sustainable Healthcare. Expert Working Group on reducing the climate change impact of inhalers. 2018. <https://networks.sustainablehealthcare.org.uk/networks/sustainable-respiratory-care/expert-working-group-reducing-climate-change-impact-inhalers> (accessed June 24, 2019).
- 12 Goulet B, Olson L, Mayer B. A Comparative Life Cycle Assessment between a Metered Dose Inhaler and Electric Nebulizer. *Sustainability* 2017; **9**: 1725.
- 13 GSK. Complete the cycle – how we’re recycling inhalers. 2018. <https://www.gsk.com/en-gb/behind-the-science/how-we-do-business/complete-the-cycle-how-we-re-recycling-inhalers/> (accessed July 18, 2018).
- 14 Hänsel M, Bambach T, Wachtel H. Reduced environmental impact of a reusable soft mist inhaler. *Eur Respir J* 2018; **52**: PA1021.
- 15 NHS England. NHS digital. 2017. <https://digital.nhs.uk/prescribing> (accessed July 17, 2018).

- 1  
2  
3 16 Cheyne L, Irvin-Sellers MJ, White J. Tiotropium versus ipratropium bromide for chronic obstructive  
4 pulmonary disease. *Cochrane Database Syst Rev* 2015. DOI:10.1002/14651858.CD009552.pub3.  
5  
6  
7 17 Global Warming Potential Values. 2014. [https://www.ghgprotocol.org/sites/default/files/ghgp/Global-](https://www.ghgprotocol.org/sites/default/files/ghgp/Global-Warming-Potential-Values%28Feb%2016%202016%29_1.pdf)  
8 [Warming-Potential-Values %28Feb 16 2016%29\\_1.pdf](https://www.ghgprotocol.org/sites/default/files/ghgp/Global-Warming-Potential-Values%28Feb%2016%202016%29_1.pdf) (accessed Jan 17, 2019).  
9  
10  
11 18 NHS Business Services Authority. [https://www.nhsbsa.nhs.uk/sites/default/files/2017-10/PCA Aug](https://www.nhsbsa.nhs.uk/sites/default/files/2017-10/PCA%20Aug%2017.xlsx)  
12 [17.xlsx %0A](https://www.nhsbsa.nhs.uk/sites/default/files/2017-10/PCA%20Aug%2017.xlsx) (accessed Aug 21, 2018).  
13  
14 19 Montreal Protocol On Substances that Deplete the Ozone Layer Report of the UNEP Medical Technical  
15 Options Committee 2014 Assessment. Nairobi, Kenya, 2014.  
16  
17  
18 20 Sellers WFS. Asthma pressurised metered dose inhaler performance: propellant effect studies in  
19 delivery systems. *Allergy Asthma Clin Immunol* 2017; **13**: 30.  
20  
21 21 Akehurst RA, Taylor AJ, Wyatt DA. Aerosol formulations containing propellant 134a and fluticasone  
22 propionate. 1997; published online Aug 19. <https://www.google.com/patents/US5658549>.  
23  
24  
25 22 Ian I, Ashurst C, Herman CS, Li-bovet L, Riebe MT. United States Patent ( 19 ). 2000.  
26  
27 23 Atherton M. ENVIRONMENTAL IMPACT OF INHALERS. 2017. [https://www.greatermanchester-](https://www.greatermanchester-ca.gov.uk/download/meetings/id/2423/environmental_impact_of_inhalers)  
28 [ca.gov.uk/download/meetings/id/2423/environmental\\_impact\\_of\\_inhalers](https://www.greatermanchester-ca.gov.uk/download/meetings/id/2423/environmental_impact_of_inhalers) (accessed Aug 27, 2018).  
29  
30  
31 24 Brambilla G, Johnson R, Lewis DA. Aerosol inhalation device. 2014; published online March 6.  
32 <https://www.google.com/patents/WO2014033057A1?cl=en>.  
33  
34  
35 25 Brown M, Jones S, Martin G. Metered dose inhalation preparations of therapeutic drugs. 2010.  
36 [https://patents.google.com/patent/WO2005055985A1/en?q=qvar+AND+HFA134&oq=qvar+AND+HF](https://patents.google.com/patent/WO2005055985A1/en?q=qvar+AND+HFA134&oq=qvar+AND+HFA134)  
37 [A134](https://patents.google.com/patent/WO2005055985A1/en?q=qvar+AND+HFA134&oq=qvar+AND+HFA134) (accessed Aug 17, 2018).  
38  
39  
40 26 (DMETS) D of ME and TS. CENTER FOR DRUG EVALUATION AND RESEARCH  
41 APPLICATION NUMBER: NDA 21-254. 2006  
42 [https://www.accessdata.fda.gov/drugsatfda\\_docs/nda/2006/021254s000\\_NameR.pdf](https://www.accessdata.fda.gov/drugsatfda_docs/nda/2006/021254s000_NameR.pdf).  
43  
44  
45 27 Mueller-Walz R, Fueg LM. Medicinal aerosol formulations. 2014; published online Oct 23.  
46 <https://www.google.com/patents/US20140314684>.  
47  
48  
49 28 Liew KL, Wilkinson A. P280 How do we choose inhalers? patient and physician perspectives on  
50 environmental, financial and ease-of-use factors. *Thorax* 2017; **72**: A235 LP-A237.  
51  
52  
53 29 Sanchis J, Gich I, Pedersen S. Systematic review of errors in inhaler use: Has patient technique  
54 improved over time? *Chest* 2016; **150**: 394–406.  
55  
56  
57 30 Woodcock A, Vestbo J, Bakerly ND, *et al*. Effectiveness of fluticasone furoate plus vilanterol on asthma  
58 control in clinical practice: an open-label, parallel group, randomised controlled trial. *Lancet* 2017; **390**:  
59 2247–55.  
60

- 1  
2  
3 31 Vestbo J, Leather D, Diar Bakerly N, *et al.* Effectiveness of Fluticasone Furoate–Vilanterol for COPD  
4 in Clinical Practice. *N Engl J Med* 2016; **375**: 1253–60.  
5  
6  
7 32 Price D, Roche N, Christian Virchow J, *et al.* Device type and real-world effectiveness of asthma  
8 combination therapy: An observational study. *Respir Med* 2011; **105**: 1457–66.  
9  
10  
11 33 Price DB, Rigazio A, Small MB, Ferro TJ. Historical cohort study examining comparative effectiveness  
12 of albuterol inhalers with and without integrated dose counter for patients with asthma or chronic  
13 obstructive pulmonary disease. *J Asthma Allergy* 2016; **Volume 9**: 145–54.  
14  
15  
16 34 Price D, Haughney J, Sims E, *et al.* Effectiveness of inhaler types for real-world asthma management:  
17 retrospective observational study using the GPRD. *J Asthma Allergy* 2011; **4**: 37–47.  
18  
19  
20 35 Conner JB, Buck PO. Improving Asthma Management: The Case for Mandatory Inclusion of Dose  
21 Counters on All Rescue Bronchodilators. *J Asthma* 2013; **50**: 658–63.  
22  
23  
24 36 Webb N, Broomfield M, Brown P, *et al.* UK greenhouse gas inventory, 1990 to 2012: annual report for  
25 submission under the Framework Convention on Climate Change. 2014  
26 [https://assets.publishing.service.gov.uk/government/uploads/system/uploads/attachment\\_data/file/57317](https://assets.publishing.service.gov.uk/government/uploads/system/uploads/attachment_data/file/573172/UKnationalinventoryreport1990-2014.pdf)  
27 [2/UKnationalinventoryreport1990-2014.pdf](https://assets.publishing.service.gov.uk/government/uploads/system/uploads/attachment_data/file/573172/UKnationalinventoryreport1990-2014.pdf)  
28 <http://nora.nerc.ac.uk/508171/>.  
29  
30  
31 37 Williamson IJ, Reid A, Monie RD, Fennerty AG, Rimmer EM. Generic inhaled salbutamol versus  
32 branded salbutamol. A randomised double-blind study. *Postgrad Med J* 1997; **73**: 156–8.  
33  
34  
35 38 Waste and Resources Action Programme. Inhalers | Recycle Now. [https://www.recyclenow.com/what-](https://www.recyclenow.com/what-to-do-with/inhalers-0)  
36 [to-do-with/inhalers-0](https://www.recyclenow.com/what-to-do-with/inhalers-0) (accessed May 20, 2019).  
37  
38  
39 39 NHS Grampian audit. [www.dontwasteabreath.com/view/facts](http://www.dontwasteabreath.com/view/facts) (accessed March 5, 2018).  
40  
41  
42 40 Woodcock A. The president speaks: prevention is best: lessons from protecting the ozone layer. *Thorax*  
43 2012; **67**: 1028–31.  
44  
45  
46 41 Al Showair RA, Tarsin WY, Assi KH, Pearson SB, Chrystyn H. Can all patients with COPD use the  
47 correct inhalation flow with all inhalers and does training help? *Respir Med* 2007; **101**.  
48 DOI:10.1016/j.rmed.2007.06.008.  
49  
50  
51 42 Adachi Y, Adachi YS, Itazawa T, Yamamoto J, Murakami G, Miyawaki T. Measurement of peak  
52 inspiratory flow rates with an in-check meter to identify preschool children’s ability to use dry powder  
53 inhalers; Diskus and Turbuhaler. *J Allergy Clin Immunol* 2018; **113**: S114.  
54  
55  
56 43 Bosnic-Anticevich S, Chrystyn H, Costello RW, *et al.* The use of multiple respiratory inhalers requiring  
57 different inhalation techniques has an adverse effect on COPD outcomes. *Int J Chron Obstruct Pulmon*  
58 *Dis* 2017; **12**: 59–71.  
59  
60  
61 44 Broeders MEAC, Molema J, Hop WCJ, Vermue NA, Folgering HTM. The course of inhalation profiles  
62 during an exacerbation of obstructive lung disease. *Respir Med* 2004; **98**: 1173–9.

- 1  
2  
3 45 Keeley D, Partridge MR. Emergency MDI and spacer packs for asthma and COPD. *Lancet Respir Med*  
4 2019; **7**: 380–2.  
5  
6  
7 46 Wynes S, Nicholas KA. The climate mitigation gap: education and government recommendations miss  
8 the most effective individual actions. *Environ* 2017; **12**: 1–9.  
9  
10 47 Climate change and health. World Heal. Organ. 2018. [http://www.who.int/en/news-room/fact-](http://www.who.int/en/news-room/fact-sheets/detail/climate-change-and-health)  
11 [sheets/detail/climate-change-and-health](http://www.who.int/en/news-room/fact-sheets/detail/climate-change-and-health).  
12  
13  
14 48 Excellence NI for H and C. Patient decision aid. Inhalers for asthma. London, 2019.  
15  
16 49 Thompson J. A process for the production and screening of materials for use in pharmaceutical aerosol  
17 formulations. 2017. <https://patents.google.com/patent/EP1588698A2/> (accessed Aug 4, 2018).  
18  
19  
20 50 GODFREY APGSK, WARBY RB. Metered dose inhaler for salmeterol xinafoate. 2003; published  
21 online Sept 17. <https://www.google.co.uk/patents/EP1343550A1?cl=en>.  
22  
23  
24  
25  
26  
27  
28  
29  
30  
31  
32  
33  
34  
35  
36  
37  
38  
39  
40  
41  
42  
43  
44  
45  
46  
47  
48  
49  
50  
51  
52  
53  
54  
55  
56  
57  
58  
59  
60

**Table 1 Financial implications of switching from MDIs to DPIs**

| Inhaler type (and most common example)      | Number prescribed in 2017 | Total cost of this type of inhaler (£) | Cheapest DPI alternative                     | Cost change with proportional replacement (per 10%) | Cost change with cheapest replacement (per 10%) |
|---------------------------------------------|---------------------------|----------------------------------------|----------------------------------------------|-----------------------------------------------------|-------------------------------------------------|
| SABA (salbutamol MDI)                       | 21,930,625                | £58,195,683.24                         | Salbutamol100<br>Easyhaler™                  | £3,068,201.99                                       | £2,021,405.23                                   |
| LABA (Salmeterol 25 MDI)                    | 700,145                   | £25,250,958.95                         | Formoterol<br>Easyhaler™                     | £1,474,723.02                                       | -£1,018,957.21                                  |
| Very low dose ICS (Clenil modulite™ 50)     | 221,836                   | £82,931,128.16                         | Flixotide<br>Accuhaler™ 50, 1 inh<br>BD      | £875,534.13                                         | £ 875,534.13                                    |
| Low dose ICS (Clenil modulite™ 100)         | 3,874,077                 | £36,581,577.50                         | Beclometasone<br>Easyhaler™ 200, 1<br>inh BD | £2,461,791.16                                       | -£213,579.26                                    |
| Medium dose ICS (Clenil modulite™ 200)      | 1,683,466                 | £34,611,159.90                         | Beclometasone<br>Easyhaler™ 200, 2<br>inh BD | £3,828,332.15                                       | -£628,752.90                                    |
| High dose ICS (Clenil modulite™ 250)        | 287,604                   | £7,923,785.74                          | Budesonide<br>Easyhaler™ 400, 2<br>inh BD    | £1,084,787.73                                       | £173,464.97                                     |
| Low dose ICS+LABA (Seretide 50 Evohaler™)   | 1,181,941                 | £32,582,876.16                         | Duoresp Spiromax™<br>160/4.5, 1 inh bd       | £749,613.82                                         | £121,485.45                                     |
| Medium dose ICS+LABA (Fostair™ 100/6 MDI)   | 9,467,562                 | £373,045,012.90                        | Relvar Ellipta™ 92/,<br>1 inh OD             | £3,124,173.89                                       | -£4,876,327.15                                  |
|                                             |                           |                                        | OR Fostair 100/6<br>Nexthaler™ 2 inh BD      |                                                     | OR -<br>£1,123,070.10                           |
| High dose ICS+LABA (Seretide 250 Evohaler™) | 244,682                   | £184,212,379.80                        | Fostair 200/6<br>Nexthaler™ 2 inh BD         | -£6,454,411.73                                      | -£5,248,427.76                                  |
| ICS+LAMA+LABA (Trimbow™)                    | 5,211                     | £247,464.50                            | Trelegy Ellipta™                             | £ 552,801.25                                        | £552,801.25                                     |



Table 2 Indicative carbon footprint of commonly prescribed MDIs by inhaler class

| Class of inhaler (and most commonly prescribed inhaler in this class) | Indicative amount of HFA propellant per inhaler (g) | Global warming potential of HFA (over 100 years) <sup>17</sup> | Carbon footprint of inhaler (g CO <sub>2</sub> e) (range and midpoint in brackets) | Actuations per inhaler | Carbon footprint per actuation (g CO <sub>2</sub> e)  | Source                                                                                                           |
|-----------------------------------------------------------------------|-----------------------------------------------------|----------------------------------------------------------------|------------------------------------------------------------------------------------|------------------------|-------------------------------------------------------|------------------------------------------------------------------------------------------------------------------|
| Small volume SABA (e.g. Salamol™)                                     | 6.68-8.5                                            | 1,300                                                          | 8,680-11,050 (9,870)                                                               | 200                    | 43.4-55.3 (48.6 in life cycle analysis <sup>7</sup> ) | Published carbon footprint study. <sup>9</sup> Inhaler performance study <sup>20</sup> patent <sup>49</sup>      |
| Large volume SABA (e.g. Ventolin™)                                    | 17.32-19.8                                          | 1,300                                                          | 22,520-28,000 (25,260)                                                             | 200                    | 112-129                                               | Inhaler performance study <sup>20</sup> , patents <sup>21,22</sup> , independently certified study <sup>23</sup> |
| SAMA (e.g. Atrovent™)                                                 | 11                                                  | 1,300                                                          | 14.3kg (total product carbon footprint 14.59kg)                                    | 200                    | 71.5                                                  | Product carbon footprint published by manufacturer <sup>14</sup>                                                 |
| LABA (e.g. Salmeterol)                                                | 12                                                  | 1,300                                                          | 15,600-19,000 (17,300)                                                             | 120                    | 130                                                   | Patent <sup>50</sup> , independent study <sup>23</sup>                                                           |
| ICS (e.g. Clenil™)                                                    | 11.32-20                                            | 1,300                                                          | 14,700-26,000 (20,350)                                                             | 200                    | 73.5-130                                              | Patents <sup>24,25</sup> , independently certified study <sup>23</sup>                                           |
| HFA134a ICS/LABA (e.g. Fostair™)                                      | 12-18.2                                             | 1,300                                                          | 15,600-23,700 (19,650)                                                             | 120                    | 130-197                                               | FDA report, <sup>26</sup> Patent, <sup>21</sup> independently certified study <sup>23</sup>                      |
| HFA 227ea ICS/LABA (e.g. Flutiform™)                                  | 11                                                  | 3,320                                                          | 36,500                                                                             | 120                    | 295                                                   | Patent <sup>27</sup>                                                                                             |

**Table 3 Strategies to reduce greenhouse gas emissions from MDIs**

| Strategy                                                                                             | Effect                                                                                                                                                                           | Potential CO <sub>2</sub> e saving                                                                                                                         |
|------------------------------------------------------------------------------------------------------|----------------------------------------------------------------------------------------------------------------------------------------------------------------------------------|------------------------------------------------------------------------------------------------------------------------------------------------------------|
| Where appropriate, switch from MDI to non-propellant inhaler                                         | Avoids use of HFA propellants                                                                                                                                                    | 8-36kg per inhaler                                                                                                                                         |
| Change from large volume reliever (e.g. Ventolin Evohaler™) to small volume reliever (e.g. Salamol™) | Small volume reliever contains far less propellant                                                                                                                               | 18kg per inhaler                                                                                                                                           |
| Change from HFA227ea inhaler (e.g. Flutiform™ or Symbicort MDI™) to HFA134a inhaler                  | Uses lower GWP HFA propellant                                                                                                                                                    | 20kg CO <sub>2</sub> e per inhaler                                                                                                                         |
| Recycle used MDIs                                                                                    | The plastics and aluminium are recycled and the HFA gas is captured for re-use                                                                                                   | Estimated 4-18kg per inhaler, although potentially risks further atmospheric release of HFA by delaying incineration.                                      |
| Return used inhalers to pharmacy after use                                                           | If the pharmacy can't recycle the MDI it will be incinerated. This causes thermal degradation of the HFA into chemicals with far smaller global warming potential. <sup>38</sup> | Likely to be slightly lower than recycling due to the energy inputs for incineration, and the absence of recycled materials. Estimated 3-17kg per inhaler. |
| If there is no dose counter, ensure your patient knows how many doses the inhaler contains           | Reduce waste from disposing of half-used inhalers                                                                                                                                | Estimated to be a quarter of the inhaler's carbon footprint; roughly 4kg CO <sub>2</sub> e per inhaler.                                                    |

### Declaration of Interest

AJKW – no conflict of interest to declare

RB – no conflict of interest to declare

IS - no conflict of interest to declare

JS - Dr. Smith reports personal fees from Trumpington Street Medical Practice, grants and personal fees from NHS England, personal fees from World Health Organisation Europe, personal fees from Better Value Healthcare Ltd, personal fees from Cambridgeshire County Council, personal fees from University of Cambridge, outside the submitted work; and he is married to a practicing GP in Cambridgeshire.

### Data Sharing

Extra data is available by emailing [alex.wilkinson2@nhs.net](mailto:alex.wilkinson2@nhs.net)

### Exclusive licence

The Corresponding Author has the right to grant on behalf of all authors and does grant on behalf of all authors, a worldwide licence (<http://www.bmj.com/sites/default/files/BMJ%20Author%20Licence%20March%202013.doc>) to the Publishers and its licensees in perpetuity, in all forms, formats and media (whether known now or created

1  
2  
3 in the future), to i) publish, reproduce, distribute, display and store the Contribution, ii) translate the  
4 Contribution into other languages, create adaptations, reprints, include within collections and create  
5 summaries, extracts and/or, abstracts of the Contribution and convert or allow conversion into any format  
6 including without limitation audio, iii) create any other derivative work(s) based in whole or part on the on  
7 the Contribution, iv) to exploit all subsidiary rights to exploit all subsidiary rights that currently exist or as  
8 may exist in the future in the Contribution, v) the inclusion of electronic links from the Contribution to  
9 third party material where-ever it may be located; and, vi) licence any third party to do any or all of the  
10 above. All research articles will be made available on an open access basis (with authors being asked to  
11 pay an open access fee—see[http://www.bmj.com/about-bmj/resources-authors/forms-policies-and-](http://www.bmj.com/about-bmj/resources-authors/forms-policies-and-checklists/copyright-open-access-and-permission-reuse)  
12 [checklists/copyright-open-access-and-permission-reuse](http://www.bmj.com/about-bmj/resources-authors/forms-policies-and-checklists/copyright-open-access-and-permission-reuse)). The terms of such open access shall be governed  
13 by a [Creative Commons](#) licence—details as to which Creative Commons licence will apply to the research  
14 article are set out in our worldwide licence referred to above.  
15  
16

### 17 **Authorship statement**

18 All authors meet the required criteria for authorship:

- 19 • Substantial contributions to the conception or design of the work; or the acquisition, analysis, or  
20 interpretation of data for the work; AND
- 21 • Drafting the work or revising it critically for important intellectual content; AND
- 22 • Final approval of the version to be published; AND
- 23 • Agreement to be accountable for all aspects of the work in ensuring that questions related to the accuracy  
24 or integrity of any part of the work are appropriately investigated and resolved.

### 25 **Transparency Declaration**

26 The manuscript is an honest, accurate, and transparent account of the study being reported; that no  
27 important aspects of the study have been omitted; and that any discrepancies from the study as planned  
28 (and, if relevant, registered) have been explained.  
29

### 30 **Contributorship**

31 AJKW - helped design the study, collected and analysed the data and wrote the manuscript.

32 RB - helped design the study, collected and analysed the data and revised the manuscript.

33 IS – helped analyse the data and revise the manuscript.

34 JS- helped design the study, collected and analysed the data and revised the manuscript.  
35

### 36 **Acknowledgements**

37 Many thanks to Professor Ashley Woodcock of Manchester University for comments and help refining the  
38 manuscript.  
39

### 40 **Funding**

41 This research received no specific grant from any funding agency in the public, commercial or not-  
42 for-profit sectors?  
43  
44  
45  
46  
47  
48  
49  
50  
51  
52  
53  
54  
55  
56  
57  
58  
59  
60

## CHEERS checklist—Items to include when reporting economic evaluations of health interventions

| Section/item                                           | Item No | Recommendation                                                                                                                                                                                                                                                                                                              | Reported on page No/ line No                                                                |
|--------------------------------------------------------|---------|-----------------------------------------------------------------------------------------------------------------------------------------------------------------------------------------------------------------------------------------------------------------------------------------------------------------------------|---------------------------------------------------------------------------------------------|
| <b>Title and abstract</b>                              |         |                                                                                                                                                                                                                                                                                                                             |                                                                                             |
| Title                                                  | 1       | Identify the study as an economic evaluation or use more specific terms such as “cost-effectiveness analysis”, and describe the interventions compared.                                                                                                                                                                     | page 1, line 3 to 5                                                                         |
| Abstract                                               | 2       | Provide a structured summary of objectives, perspective, setting, methods (including study design and inputs), results (including base case and uncertainty analyses), and conclusions.                                                                                                                                     | page 2, line 1 to 38                                                                        |
| <b>Introduction</b>                                    |         |                                                                                                                                                                                                                                                                                                                             |                                                                                             |
| Background and objectives                              | 3       | Provide an explicit statement of the broader context for the study.                                                                                                                                                                                                                                                         | page 3, line 1 to 47                                                                        |
|                                                        |         | Present the study question and its relevance for health policy or practice decisions.                                                                                                                                                                                                                                       | page 3, line 47 to 53                                                                       |
| <b>Methods</b>                                         |         |                                                                                                                                                                                                                                                                                                                             |                                                                                             |
| Target population and subgroups                        | 4       | Describe characteristics of the base case population and subgroups analysed, including why they were chosen.                                                                                                                                                                                                                | page 4, line 1 to 15;<br>page 4, line 29 to 34;<br>page 4, line 55-60;<br>page 5, line 9-12 |
| Setting and location                                   | 5       | State relevant aspects of the system(s) in which the decision(s) need(s) to be made.                                                                                                                                                                                                                                        | page 4, line 16 to 27                                                                       |
| Study perspective                                      | 6       | Describe the perspective of the study and relate this to the costs being evaluated.                                                                                                                                                                                                                                         | page 4, line 11 to 15;                                                                      |
| Comparators                                            | 7       | Describe the interventions or strategies being compared and state why they were chosen.                                                                                                                                                                                                                                     | Page 4, line 16-26                                                                          |
| Time horizon                                           | 8       | State the time horizon(s) over which costs and consequences are being evaluated and say why appropriate.                                                                                                                                                                                                                    | Page 4, line 3-4                                                                            |
| Discount rate                                          | 9       | Report the choice of discount rate(s) used for costs and outcomes and say why appropriate.                                                                                                                                                                                                                                  | Not applicable                                                                              |
| Choice of health outcomes                              | 10      | Describe what outcomes were used as the measure(s) of benefit in the evaluation and their relevance for the type of analysis performed.                                                                                                                                                                                     | Page 5, lines 19-24                                                                         |
| Measurement of effectiveness                           | 11a     | <i>Single study-based estimates:</i> Describe fully the design features of the single effectiveness study and why the single study was a sufficient source of clinical effectiveness data.                                                                                                                                  | Not applicable.                                                                             |
|                                                        | 11b     | <i>Synthesis-based estimates:</i> Describe fully the methods used for identification of included studies and synthesis of clinical effectiveness data.                                                                                                                                                                      |                                                                                             |
| Measurement and valuation of preference based outcomes | 12      | If applicable, describe the population and methods used to elicit preferences for outcomes.                                                                                                                                                                                                                                 | not applicable                                                                              |
| Estimating resources and costs                         | 13a     | <i>Single study-based economic evaluation:</i> Describe approaches used to estimate resource use associated with the alternative interventions. Describe primary or secondary research methods for valuing each resource item in terms of its unit cost. Describe any adjustments made to approximate to opportunity costs. | Page 4, lines 28-60;<br>page 5, lines 10-13                                                 |

| Section/item                         | Item No | Recommendation                                                                                                                                                                                                                                                                                                                                        | Reported on page No/ line No                                                                                |
|--------------------------------------|---------|-------------------------------------------------------------------------------------------------------------------------------------------------------------------------------------------------------------------------------------------------------------------------------------------------------------------------------------------------------|-------------------------------------------------------------------------------------------------------------|
|                                      | 13b     | <i>Model-based economic evaluation:</i> Describe approaches and data sources used to estimate resource use associated with model health states. Describe primary or secondary research methods for valuing each resource item in terms of its unit cost. Describe any adjustments made to approximate to opportunity costs.                           | Financial resources: Page 4, lines 28-60; page 5, lines 10-13; Carbon costs: page 5 lines 26-page 6 line 27 |
| Currency, price date, and conversion | 14      | Report the dates of the estimated resource quantities and unit costs. Describe methods for adjusting estimated unit costs to the year of reported costs if necessary. Describe methods for converting costs into a common currency base and the exchange rate.                                                                                        | Page 4, lines 3-4                                                                                           |
| Choice of model                      | 15      | Describe and give reasons for the specific type of decision-analytical model used. Providing a figure to show model structure is strongly recommended.                                                                                                                                                                                                | Page 4, lines 16-23; table 1                                                                                |
| Assumptions                          | 16      | Describe all structural or other assumptions underpinning the decision-analytical model.                                                                                                                                                                                                                                                              | Page 5, lines 19-21; Page 5, lines 48-50 Page 6 lines 25-28 Table 1                                         |
| Analytical methods                   | 17      | Describe all analytical methods supporting the evaluation. This could include methods for dealing with skewed, missing, or censored data; extrapolation methods; methods for pooling data; approaches to validate or make adjustments (such as half cycle corrections) to a model; and methods for handling population heterogeneity and uncertainty. | Page 4, lines 12-14; Page 5 lines 16-21;                                                                    |
| <b>Results</b>                       |         |                                                                                                                                                                                                                                                                                                                                                       |                                                                                                             |
| Study parameters                     | 18      | Report the values, ranges, references, and, if used, probability distributions for all parameters. Report reasons or sources for distributions used to represent uncertainty where appropriate. Providing a table to show the input values is strongly recommended.                                                                                   | Page 6, lines 42- page 7 line 40 Table 1                                                                    |
| Incremental costs and outcomes       | 19      | For each intervention, report mean values for the main categories of estimated costs and outcomes of interest, as well as mean differences between the comparator groups. If applicable, report incremental cost-effectiveness ratios.                                                                                                                | Page 6 lines 45-51; Page 6 line 55; Page 6 line 58; Page 7 line 3-23                                        |
| Characterising uncertainty           | 20a     | <i>Single study-based economic evaluation:</i> Describe the effects of sampling uncertainty for the estimated incremental cost and incremental effectiveness parameters, together with the impact of methodological assumptions (such as discount rate, study perspective).                                                                           |                                                                                                             |
|                                      | 20b     | <i>Model-based economic evaluation:</i> Describe the effects on the results of uncertainty for all input parameters, and uncertainty related to the structure of the model and assumptions.                                                                                                                                                           | Page 8, lines 26-35; Page 8 lines 50-51;                                                                    |
| Characterising heterogeneity         | 21      | If applicable, report differences in costs, outcomes, or cost-effectiveness that can be explained by variations between subgroups of patients with different baseline characteristics or                                                                                                                                                              | not applicable                                                                                              |

| Section/item                                                         | Item No | Recommendation                                                                                                                                                                                                                                    | Reported on page No/ line No                   |
|----------------------------------------------------------------------|---------|---------------------------------------------------------------------------------------------------------------------------------------------------------------------------------------------------------------------------------------------------|------------------------------------------------|
|                                                                      |         | other observed variability in effects that are not reducible by more information.                                                                                                                                                                 |                                                |
| <b>Discussion</b>                                                    |         |                                                                                                                                                                                                                                                   |                                                |
| Study findings, limitations, generalisability, and current knowledge | 22      | Summarise key study findings and describe how they support the conclusions reached. Discuss limitations and the generalisability of the findings and how the findings fit with current knowledge.                                                 | Page 7 line 3- page 9 line 57                  |
| <b>Other</b>                                                         |         |                                                                                                                                                                                                                                                   |                                                |
| Source of funding                                                    | 23      | Describe how the study was funded and the role of the funder in the identification, design, conduct, and reporting of the analysis. Describe other non-monetary sources of support.                                                               | Information provided via the submission system |
| Conflicts of interest                                                | 24      | Describe any potential for conflict of interest of study contributors in accordance with journal policy. In the absence of a journal policy, we recommend authors comply with International Committee of Medical Journal Editors recommendations. | Information provided via the submission system |

For consistency, the CHEERS statement checklist format is based on the format of the CONSORT statement checklist
